# 1 Hydrogens and hydrogen-bond networks in macromolecular MicroED data

2  
3  
4 Max T.B. Clabbers<sup>1</sup>, Michael W. Martynowycz<sup>1,2</sup>, Johan Hattne<sup>1,2</sup>, Tamir Gonen<sup>1,2,3,\*</sup>

5  
6 <sup>1</sup>Department of Biological Chemistry, University of California, Los Angeles CA 90095

7 <sup>2</sup>Howard Hughes Medical Institute, University of California, Los Angeles CA 90095

8 <sup>3</sup>Department of Physiology, University of California, Los Angeles CA 90095

9  
10 \*For correspondence: [tgonen@g.ucla.edu](mailto:tgonen@g.ucla.edu)

## 11 12 13 Abstract

14  
15 Microcrystal electron diffraction (MicroED) is a powerful technique utilizing electron cryo-  
16 microscopy (cryo-EM) for protein structure determination of crystalline samples too small for X-  
17 ray crystallography. Electrons interact with the electrostatic potential of the sample, which means  
18 that scattered electrons carry information about the charged state of atoms and can provide strong  
19 contrast for visualizing hydrogen atoms. Accurately identifying the positions of hydrogen atoms,  
20 and by extension the hydrogen bonding networks, is of importance for drug discovery and  
21 electron microscopy can enable such visualization. Using subatomic resolution MicroED data  
22 obtained from triclinic hen egg-white lysozyme, we identified hundreds of individual hydrogen  
23 atom positions and directly visualize hydrogen bonding interactions and the charged states of  
24 residues. Over a third of all hydrogen atoms are identified from strong difference peaks, the most  
25 complete view of a macromolecular hydrogen network visualized by electron diffraction to date.  
26 These results show that MicroED can provide accurate structural information on hydrogen atoms  
27 and non-covalent hydrogen bonding interactions in macromolecules. Furthermore, we find that  
28 the hydrogen bond lengths are more accurately described by the inter-nuclei distances than the  
29 centers of mass of the corresponding electron clouds. We anticipate that MicroED, coupled with  
30 ongoing advances in data collection and refinement, can open further avenues for structural  
31 biology by uncovering and understanding the hydrogen bonding interactions underlying protein  
32 structure and function.

33

## 34 Main

35

36 Microcrystal electron diffraction (MicroED) has been successful in structure determination of  
37 crystalline biological specimens using electron cryo-microscopy (cryo-EM) (Nannenga, Shi,  
38 Leslie *et al.*, 2014; Nannenga, Shi, Hattne *et al.*, 2014; Yonekura *et al.*, 2015), including novel  
39 structures (Rodriguez *et al.*, 2015; Sawaya *et al.*, 2016; Xu *et al.*, 2019; Clabbers *et al.*, 2021), as  
40 well as difficult to crystallize membrane proteins in detergents and lipids (Liu & Gonen, 2018;  
41 Martynowycz *et al.*, 2020; Martynowycz, Shiriaeva *et al.*, 2021). As electrons interact more  
42 strongly with matter than X-rays (Henderson, 1995), the crystal volume required for useful  
43 diffraction is typically about a million times smaller. Electrons are scattered by the electrostatic  
44 potential and the strength of scattering depends on the charged state of atoms (Cowley, 1995).  
45 The effects of charge distribution are already apparent at moderate to low resolution (Yonekura  
46 *et al.*, 2015, 2018), and the charged state of residues in macromolecules has previously been  
47 investigated using electron crystallography (Kimura *et al.*, 1997; Mitsuoka *et al.*, 1999;  
48 Yonekura *et al.*, 2015).

49

50 Electrostatic potential maps obtained from electron scattering can provide strong contrast  
51 for identifying hydrogen atoms, which has enabled localizing hydrogens in electron diffraction  
52 structures of small molecule organics and peptide fragments (Rodriguez *et al.*, 2015; Sawaya *et al.*,  
53 2016; Dorset, 1995; Palatinus *et al.*, 2017; Gruene *et al.*, 2018; Jones *et al.*, 2018; Clabbers *et al.*,  
54 2019; Takaba *et al.*, 2021). Identifying the positions of hydrogen atoms and visualizing their  
55 resulting hydrogen bonding networks are crucial for understanding protein structure and function  
56 such as resolving precise drug or ligand binding interactions (Purdy *et al.*, 2018; Clabbers *et al.*,  
57 2020; Martynowycz, Shiriaeva *et al.*, 2021) or elucidating mechanisms for substrate transfer in  
58 membrane protein transporters and channels (Gonen *et al.*, 2005; Liu & Gonen, 2018). In single-  
59 particle cryo-EM imaging, individual hydrogen atom positions were localized from  
60 reconstructions of apoferritin at 1.2 Å resolution (Nakane *et al.*, 2020; Maki-Yonekura *et al.*,  
61 2021) and for the GABA<sub>A</sub> receptor at 1.7 Å resolution (Nakane *et al.*, 2020). Here, hydrogen  
62 atoms were identified by omitting them from the model and inspecting the peaks in a calculated  
63  $F_o - F_c$  difference map following refinement in *Servalcat* based on crystallographic refinement  
64 routines implemented in *REFMAC5* (Murshudov *et al.*, 2011; Yamashita *et al.*, 2021). Since  
65 resolution is a local feature in cryo-EM, the accuracy of hydrogen identification varies across the  
66 map.

67

68 Visualizing hydrogen atoms in macromolecular crystallography generally requires (sub-)  
69 atomic resolution data, and the accuracy of localizing hydrogens varies with local structural  
70 flexibility which is reflected by the temperature factors. Typically, crystals of macromolecules  
71 are more disordered than peptides or small molecules and have a much higher solvent content.  
72 Therefore, in absence of atomic resolution data, identification of hydrogen atoms in  
73 macromolecular MicroED structures has remained elusive.

74  
75  
76  
77  
78  
79  
80  
81  
82  
83  
84  
85  
86  
87  
88  
89  
90  
91  
92  
93  
94  
95  
96  
97  
98  
99  
100  
101  
102  
103  
104  
105  
106  
107  
108  
109  
110  
111  
112  
113

## Identifying hydrogen atoms in MicroED data

Recently, we reported the structure of triclinic hen egg-white lysozyme at 0.87 Å resolution using electron-counted MicroED data (Martynowycz, Clabbers, Hattne *et al.*, 2021). MicroED data were collected from 16 crystal lamellae and the structure was phased *ab initio* as described previously (Supplementary Fig. 1) (Martynowycz, Clabbers, Hattne *et al.*, 2021). Following density modification individual atoms could be resolved at sub-Ångström resolution, enabling automated model building of the entire structure without reference to a previously determined homologous model (Martynowycz, Clabbers, Hattne *et al.*, 2021). The improvement in data accuracy and resolution in this study compared to previous efforts was realized by combining focused ion-beam milling to produce approximately 300 nm thin crystalline lamellae ideal for cryo-EM at 300 kV (Martynowycz, Clabbers, Unge *et al.*, 2021), and collecting data in electron-counting mode at a significantly reduced exposure of only 0.64 e<sup>-</sup>·Å<sup>-2</sup> per crystal dataset (Martynowycz, Clabbers, Hattne *et al.*, 2021). A low exposure rate is required for electron counting as it ensures that the rate of scattered electrons remains within the linear range of the camera. Lowering the total exposure also reduces the effects of radiation damage that can affect the structural integrity of the protein and the ability to localize hydrogen atoms (Hattne *et al.*, 2018; Leapman & Sun, 1995).

We set out to further refine the *ab initio* model resulting from automated building against the subatomic resolution MicroED data to closely examine individual hydrogen atom positions. First, the structural model was refined using electron scattering factors, isotropic atomic displacement parameters, and the default riding hydrogen model in *REFMAC5* (Murshudov *et al.*, 2011). Twelve alternate side-chain conformations were modeled upon visual inspection using *Coot* (Emsley *et al.*, 2010), and their occupancies were refined. The model was then refined using anisotropic *B*-factors until convergence (Supplementary Table 1). A crystallographic  $mF_o - DF_c$  difference map was calculated using a model without hydrogen atoms (Yamashita *et al.*, 2021). Peaks in the difference hydrogen omit map at  $\geq 2.0\sigma$  were then identified using *PEAKMAX* (Winn *et al.*, 2011), and those within 0.5 Å distance from any idealized riding position were identified as potential hydrogen atoms. In this manner, we located 376 out of 1067 possible hydrogen atoms corresponding to about 35% of the entire structure. Lowering the threshold to  $1.0\sigma$  revealed a total of 562 hydrogen atom positions, approximately 53%. At contour levels below  $2.0\sigma$ , the difference map is noisier, increasing the chance of false positives and making it more challenging to unambiguously identify peaks as hydrogen atoms. Nevertheless, these results are the most complete hydrogen bonding network visualized to date by macromolecular MicroED (Table 1).

## 114 Visualizing hydrogens and hydrogen bonding networks

115  
116 Overall, the protein main chain is expected to be more rigid than the side chains; we  
117 consequently expect more hydrogen atoms to be found in the backbone than in the protein side  
118 chains. At the  $2.0\sigma$  threshold, we identified 61 out of 141 possible C $\alpha$ -H hydrogens and 76 out  
119 of 127 peptide N-H hydrogen bonds corresponding to approximately 43 and 60% of the entire  
120 structure, respectively (Table 1, Supplementary Tables 2, 3, and 8). The backbone hydrogen  
121 atoms are structurally important and can be involved in forming and stabilizing secondary  
122 structural elements via non-covalent hydrogen-bonding interactions. For example, the structure  
123 of lysozyme has two short antiparallel  $\beta$ -strands and we could identify three strong difference  
124 peaks at  $>3.0\sigma$  indicating the positions of those hydrogen atoms involved in hydrogen bonding  
125 interactions (Fig. 1a, Supplementary Video 1). The average N-H distance in the  $\beta$ -strands is  
126 1.14(26) Å distance, and the distance between the amide group hydrogen donor and carbonyl  
127 acceptor is 2.76(9) Å (Table 2). Interestingly, whereas the Asp52 and Gly54 N-H distances are  
128 close to the idealized positions, the difference peak for the Asn44 N-H is located at an almost  
129 equal distance shared between the donor and Asp52 carbonyl acceptor (Fig. 1a, Table 2). The  
130 structure of lysozyme is further composed of several short helices, and we could identify a total  
131 of 15 hydrogen bonding interactions in the three standard  $\alpha$ -helices (Table 2). For example, in  
132 the longest 12-residue  $\alpha$ -helix we identified 6 out of 10 possible hydrogen bonds based on strong  
133 difference peaks at  $>2.7\sigma$  (Fig. 1b, Supplementary Video 2). The average hydrogen atom peptide  
134 N-H distance for the  $\alpha$ -helices is 0.97(14) Å with an average distance between donor and  
135 acceptor of 2.84(13) Å (Table 2).

136  
137 Higher flexibility and alternate conformations can affect localizing hydrogen atoms in the  
138 side chains. Nevertheless, we could successfully localize side-chain hydrogen atoms in the data  
139 and identify several hydrogen-bonding interactions between side-chain atoms (Fig. 2,  
140 Supplementary Table 2). For example, a difference peak at  $2.4\sigma$  can be resolved between His15-  
141 NE2 and Thr89-OG1 indicating a possible shared hydrogen bond between both side chains (Fig.  
142 2a). As expected at pH 4.5, the data shows the solvent-exposed histidine to be protonated at  
143 ND1, although the hydrogen distance and angle are different from idealized geometry (Fig. 2a).  
144 Another example of hydrogen bonding interactions is illustrated for Tyr53-OH acting as a  
145 hydrogen donor to Asp66-OD1 with a strong difference peak at  $3.4\sigma$  (Fig. 2b, Supplementary  
146 Table 2).

147  
148 In single-particle cryo-EM, it was previously observed that acidic side chains were poorly  
149 resolved at moderate to low resolution owing to radiation damage and due to the rapid fall off of  
150 the electron scattering factors for negatively charged atoms at lower scattering angles (Yonekura  
151 *et al.*, 2015, 2018; Maki-Yonekura *et al.*, 2021). In the MicroED data, the acidic aspartate and  
152 glutamate residues and their negatively charged side-chain carboxyl groups are generally well  
153 resolved (Fig. 2c). Additionally, clear difference peaks at  $>2.3\sigma$  were identified in the data for

154 the amide side-chain nitrogen for asparagine and glutamine residues, making it possible to  
155 clearly distinguish between the nitrogen and oxygen atoms of the side-chain amide group (Fig.  
156 2c).

157

158 Difference peaks were also identified for several water molecules that are involved in  
159 hydrogen bonding interactions with the protein backbone and side chains (Fig. 2d,  
160 Supplementary Video 3). Such hydrogen bonding networks can act as long-range proton transfer  
161 wires. For example, a water molecule is coordinated with the adjacent Ser91, Leu56, and Tyr53  
162 residues and shows two strong difference peaks at  $\geq 2.7\sigma$  (Fig. 2d). Two additional water  
163 molecules show hydrogen atom peaks at  $\geq 2.2\sigma$  and are involved in hydrogen bonding  
164 interactions with each other and residues of the neighboring protein backbone (Fig. 2d). The O-H  
165 hydrogen bond lengths and angles of the water molecules are reasonably close to ideal values,  
166 except for one O-H distance for w1001 which is significantly shorter at 0.64 Å. The hydrogen  
167 bond distance between the w1001-O proton donor and the Tyr53-O proton acceptor is however  
168 close to ideal values at 2.75 Å.

169

170

## 171 Hydrogen bond distances

172

173 The sheer numbers of hydrogens visualized in this study allow us to measure and report  
174 hydrogen bond distances in a way previously not possible in cryoEM (Supplementary Tables 2-  
175 10; Figure 3). Electrons are scattered by the potential field generated from electron clouds *and*  
176 the nuclei; similar to neutron diffraction. The peaks in an electrostatic potential map are therefore  
177 expected to reflect the inter-nuclei distances more than distances between centers of mass of  
178 electron clouds as observed in X-ray diffraction. We refined the structure using the default riding  
179 hydrogen model based on hydrogen distances between the electron cloud centroids using  
180 restraints derived from X-ray scattering. We analyzed the identified hydrogen atom difference  
181 peaks in the data at  $\geq 2.0\sigma$  and calculated the average distance for each of the hydrogen bond  
182 types (Table 1, Figure 3, Supplementary Tables 2–10). The number of observations for some  
183 bond types is insufficient for a rigorous statistical analysis. We do however find an average C $\alpha$ -  
184 H distance for the main chain of 1.11(13) Å for 61 hydrogen bonds, compared to idealized values  
185 of 0.98 and 1.10 Å for X-ray and neutron diffraction, respectively (Table 1, Figure 3,  
186 Supplementary Table 3). The average distance for all N-H bonds is 1.03(16) Å for 83  
187 observations, compared to idealized values of 0.98 and 1.10 Å for X-ray and neutron diffraction,  
188 respectively (Supplementary Tables 2 and 8). Interestingly, the distances for the amide N-H  
189 bonds that are involved in hydrogen bonding interactions with neighboring residues are slightly  
190 longer compared to those that are not involved in such electrostatic interactions (Table 1, Figure  
191 3).

192

193           These results suggest an elongation of the hydrogen bond lengths compared to the  
194 electron cloud centroid distances assumed in the riding hydrogen mode, although the number of  
195 observations for each type is rather limited and the standard deviations from the mean value are  
196 quite large (Table 1, Figure 3). Nevertheless, we find an overall trend that the C $\alpha$ -H and N-H  
197 bond lengths are closer inter-nuclei distances (Gruene *et al.*, 2014; Williams *et al.*, 2018). This  
198 observation agrees with previous electron diffraction and imaging experiments that show an  
199 apparent elongation of the hydrogen bond lengths compared to X-ray diffraction (Clabbers *et al.*,  
200 2019; Takaba *et al.*, 2021; Nakane *et al.*, 2020; Maki-Yonekura *et al.*, 2021). Refinement of  
201 structural models derived from electron scattering would therefore benefit from more appropriate  
202 restraints specific for electrons, including a more accurate riding hydrogen model, as well as  
203 taking the electrostatic potential of the crystal into account (Yonekura *et al.*, 2015, 2018;  
204 Murshudov *et al.*, 2011; Yamashita *et al.*, 2021; Gruene *et al.*, 2014; Williams *et al.*, 2018).

205

206

## 207 Conclusions

208

209 The results demonstrate that hydrogen atom positions can be accurately identified in  
210 macromolecular MicroED data. As with X-ray crystallography, this will typically require atomic  
211 resolution data or better (Walsh *et al.*, 1998; Howard *et al.*, 2004; Wang *et al.*, 2007; Eriksson *et al.*,  
212 2013; Ogata *et al.*, 2015). In comparison, the structure of triclinic lysozyme was determined  
213 previously using X-ray diffraction at 120 K and room temperature to 0.93 and 0.95 Å resolution,  
214 respectively (Walsh *et al.*, 1998). The single-crystal low-temperature structure is of high quality  
215 and generally has more clearly visible hydrogen atoms than the room temperature model merged  
216 from three crystal datasets. Difference maps contoured at 1.9 $\sigma$  visualize hydrogen atoms in  
217 residues within the better-defined regions of the structure, and at 1.8 $\sigma$  contour level, 77 out of  
218 127 peptide N-H atoms (61%) are identified (Walsh *et al.*, 1998). The number of hydrogen atoms  
219 localized in the low-temperature structure is similar to the MicroED structure at comparable  
220 resolution, even though the intensity and model statistics are worse (Supplementary Table 1,  
221 Supplementary Fig. 1) (Martynowycz, Clabbers, Hattne *et al.*, 2021). The higher level of  
222 inaccuracy in the MicroED data can in part be attributed to non-isomorphism from merging of 16  
223 crystal datasets and lower completeness in the highest resolution shells (Supplementary Fig. 1).  
224 Additional factors that contribute to the errors are inelastic scattering and inaccurate modeling of  
225 the electron form factors and the electrostatic potential in structure refinement (Yonekura *et al.*,  
226 2015, 2018; Murshudov *et al.*, 2011; Yamashita *et al.*, 2021). Compared to X-ray diffraction,  
227 electrons are expected to provide better contrast for identifying hydrogen atoms at a similar  
228 resolution as the scattering factors fall off less steeply with decreasing atomic number. The  
229 lighter hydrogen atoms are therefore expected to be better resolved next to the heavier atoms,  
230 which might explain why we can identify many hydrogen atoms even though the MicroED data  
231 appear noisier. This is further supported by a comparison between apoferritin models from X-ray  
232 crystallography and single-particle cryo-EM showed that hydrogen atoms were visibly more

233 clearly in the latter (Yamashita *et al.*, 2021). More recently, a significantly higher resolution  
234 structure of triclinic lysozyme was solved *ab initio* at 0.65 Å by X-ray diffraction (Wang *et al.*,  
235 2007). At this resolution, approximately 31% of all hydrogen atoms in main and side chains  
236 could be identified at  $3.0\sigma$  or higher. We would anticipate major improvements in hydrogen  
237 atom localization in MicroED data upon further increasing the resolution.

238  
239 Previously, hydrogen atoms were successfully identified in protein complexes by single-  
240 particle cryo-EM. In comparison to the results presented here, these studies reported that about  
241 70% of the expected number of hydrogen atoms could be identified above a threshold level of  
242  $2.0\sigma$  using hydrogen-only omit maps from atomic resolution reconstructions of apoferritin  
243 (Yamashita *et al.*, 2021; Maki-Yonekura *et al.*, 2021). Remarkably, about 17% of possible  
244 hydrogen atoms could be identified from data as low as 1.84 Å resolution (Yamashita *et al.*,  
245 2021). In imaging, the phase information is retained and during reconstruction, images are  
246 filtered to remove noise and to select a specific conformational state. The resolution is therefore  
247 a local feature of the map whereas the *B*-factor is a global parameter applied in map sharpening  
248 or blurring. This is unlike a crystallographic map, where the resolution is a global feature of the  
249 entire dataset and structural flexibility or disorder is modeled locally using alternate  
250 conformation and per atom refined *B*-factors. In crystallography, resolving detailed features such  
251 as hydrogen atoms is affected by local disorder. In the MicroED structure, twelve residues are  
252 modeled with alternate side-chain conformations at low occupancy, making it more challenging  
253 to identify hydrogen at these positions. The mean *B*-factor over all atoms in the model is 11.98  
254 Å<sup>2</sup>, and the majority of outliers are on the outside of the protein facing the solvent. Lower  
255 completeness in the higher resolution shells and non-isomorphism from merging data of multiple  
256 crystals could both contribute to increased *B*-factors. Especially the last two C-terminal residues  
257 have high temperature factors, these were also poorly resolved in the high-resolution X-ray  
258 diffraction structure (Walsh *et al.*, 1998). Indeed, most hydrogens can be identified within the  
259 more stable core of the protein relative to the residues on the outside facing the solvent having  
260 higher flexibility and *B*-factors.

261  
262 In all, 377/1067 (35%) hydrogen atoms could be located at  $\geq 2.0\sigma$  and we illustrate  
263 several examples of well resolved hydrogen atom positions and hydrogen bonding interactions  
264 between protein residues and solvent molecules. This is the most complete hydrogen network  
265 map for macromolecular MicroED data to date, and these results provide a glimpse of the  
266 information that can be obtained by electron scattering, opening up new avenues for further  
267 experiments investigating hydrogen bonding networks in protein structures. At the current stage,  
268 the difference map becomes increasingly noisy at contour levels below  $2.0\sigma$ , making it more  
269 challenging to unambiguously identify hydrogen peaks. Future efforts that can enhance the  
270 localization of hydrogen atoms should be focused on improving data accuracy and resolution  
271 even further. Energy filtration can improve data quality by discarding inelastically scattered  
272 electrons, improving the detection of weak peaks at high resolution and at the lower scattering

273 angles that are shaded by the direct beam (Yonekura *et al.*, 2015, 2019). It would also mean the  
274 exposure could be lowered even further without losing the weak signal from high-resolution  
275 reflections to the noise of the background. Energy filtering does not exclude multiple elastic  
276 scattering which may affect the measured kinematic intensities (Fujiwara, 1959; Cowley, 1995).  
277 For any typical hydrated protein crystal, these effects are suggested to be far less detrimental to  
278 data quality compared to inelastic scattering (Latychevskaia & Abrahams, 2019; Martynowycz,  
279 Clabbers, Unge *et al.*, 2021). Dynamical structure refinement can enhance the localization of  
280 hydrogen atoms in small molecule structures (Palatinus *et al.*, 2017), but its implementation is  
281 computationally expensive and has yet to be extended to macromolecules that include bulk  
282 solvent that cannot be modeled. In recent experiments, recording MicroED data using a direct  
283 electron detector in electron counting mode significantly improved data quality, and we expect  
284 further benefits from faster readout and better electron-counting algorithms using electron-event  
285 representation (Guo *et al.*, 2020; Nakane *et al.*, 2020).

286

287

## 288 Methods

289

### 290 Crystallization and sample preparation

291

292 Crystalline lamellae of triclinic lysozyme were prepared as described previously (Martynowycz,  
293 Clabbers, Hattne *et al.*, 2021). Briefly, crystals of hen egg-white lysozyme (*Gallus gallus*) were  
294 grown by dissolving 10 mg/ml protein in a solution of 0.2 M sodium nitrate and 50 mM sodium  
295 acetate at pH 4.5. After incubation overnight at 4 °C an opaque suspension was observed. After  
296 further incubation for one week at room temperature a crystalline slurry appeared containing  
297 microcrystals. Samples were prepared by depositing 3 µl of the crystalline slurry onto a glow-  
298 discharged EM grid (Quantifoil, Cu 200 mesh, R2/2 holey carbon). Excess liquid was blotted  
299 away and the sample was vitrified using a Leica GP2 vitrification robot. Grids were transferred  
300 to an Aquilos dual-beam FIB/SEM (Thermo Fisher) and crystals were milled to lamellae with an  
301 optimal thickness of approximately 300 nm as described previously (Martynowycz, Clabbers,  
302 Hattne *et al.*, 2021; Martynowycz, Clabbers, Unge *et al.*, 2021).

303

### 304 Data collection and processing

305

306 Electron-counted MicroED data were collected on a Titan Krios 3Gi TEM (Thermo Fisher)  
307 operated at 300 kV as described previously (Martynowycz, Clabbers, Hattne *et al.*, 2021).  
308 Briefly, the TEM was set up for low exposure data collection using a 50 µm C2 aperture, spot  
309 size 11, and a beam diameter of 25 µm. A 100 µm SA aperture was used, corresponding to an  
310 area of 2 µm diameter on the specimen. Crystal lamellae were continuously rotated over a range  
311 of 84° at a rotation speed of 0.2°/s over 420s with a total exposure of approximately 0.64 e<sup>-</sup>·Å<sup>-2</sup>  
312 per dataset. Data were recorded on a Falcon 4 direct electron detector (Thermo Fisher) in  
313 electron counting mode operating at an internal frame rate of 250 Hz. Data of 16 crystal lamellae



314 were integrated, scaled and merged using *XDS* (Kabsch, 2010) and *AIMLESS* (Evans &  
315 Murshudov, 2013). The structure was phased *ab initio* by placing a three-residue idealized  $\alpha$ -  
316 helix fragment using *PHASER* (McCoy *et al.*, 2007) followed by density modification in *ACORN*  
317 (Foadi *et al.*, 2000). The entire structure was built automatically using *BUCCANEER* (Cowtan,  
318 2006) and refined in *REFMAC5* (Murshudov *et al.*, 2011) using electron scattering factors.

319

#### 320 Identification of hydrogen atoms

321

322 The structure was manually inspected and remodeled using *Coot* (Emsley *et al.*, 2010), and re-  
323 refined with *REFMAC5* (Murshudov *et al.*, 2011) using electron scattering factors. Hydrogen  
324 atoms were added in idealized riding positions. A hydrogen-only omit was calculated from the  
325 final structural model by *REFMAC5* (Murshudov *et al.*, 2011). Peaks in the  $mF_o - DF_c$   
326 difference map at a threshold above  $2.0\sigma$  were identified and listed using *PEAKMAX* in the  
327 CCP4 software package (Winn *et al.*, 2011). Difference peaks that fell within  $0.5 \text{ \AA}$  of the  
328 idealized distance for the known positions were assigned as hydrogen atoms.

329

#### 330 Figure preparation

331

332 Figures were prepared using ChimeraX and assembled in powerpoint and photoshop.

333

334

#### 335 Data availability

336

337 Coordinates and structure factors have been deposited to the PDB.

338

339

340

#### 341 Acknowledgements

342

343 This study was supported by the National Institutes of Health P41GM136508. The Gonen  
344 laboratory is supported by funds from the Howard Hughes Medical Institute.

345

346

347

348

349

350

351

352

353

354

355

356  
357  
358  
359  
360  
361  
362  
363  
364  
365  
366  
367  
368  
369  
370  
371  
372  
373  
374  
375  
376  
377  
378  
379  
380  
381  
382  
383  
384  
385  
386  
387  
388  
389  
390  
391

## References

- Clabbers, M. T. B., Fisher, S. Z., Coinçon, M., Zou, X. & Xu, H. (2020). *Commun. Biol.* **3**, 417.
- Clabbers, M. T. B., Gruene, T., van Genderen, E. & Abrahams, J. P. (2019). *Acta Crystallogr. Sect. Found. Adv.* **75**, 82–93.
- Clabbers, M. T. B., Holmes, S., Muusse, T. W., Vajjhala, P. R., Thygesen, S. J., Malde, A. K., Hunter, D. J. B., Croll, T. I., Flueckiger, L., Nanson, J. D., Rahaman, Md. H., Aquila, A., Hunter, M. S., Liang, M., Yoon, C. H., Zhao, J., Zatsepin, N. A., Abbey, B., Sieracki, E., Gambin, Y., Stacey, K. J., Darmanin, C., Kobe, B., Xu, H. & Ve, T. (2021). *Nat. Commun.* **12**, 2578.
- Cowley, J. M. (1995). *Diffraction physics*. Amsterdam: North-Holland.
- Cowtan, K. (2006). *Acta Crystallogr. D Biol. Crystallogr.* **62**, 1002–1011.
- Dorset, D. L. (1995). *Structural electron crystallography*. New York: Plenum Press.
- Emsley, P., Lohkamp, B., Scott, W. G. & Cowtan, K. (2010). *Acta Crystallogr. D Biol. Crystallogr.* **66**, 486–501.
- Eriksson, U. K., Fischer, G., Friemann, R., Enkavi, G., Tajkhorshid, E. & Neutze, R. (2013). *Science*.
- Evans, P. R. & Murshudov, G. N. (2013). *Acta Crystallogr. D Biol. Crystallogr.* **69**, 1204–1214.
- Foadi, J., Woolfson, M. M., Dodson, E. J., Wilson, K. S., Jia-xing, Y. & Chao-de, Z. (2000). *Acta Crystallogr. D Biol. Crystallogr.* **56**, 1137–1147.
- Fujiwara, K. (1959). *J. Phys. Soc. Jpn.* **14**, 1513–1524.
- Gonen, T., Cheng, Y., Sliz, P., Hiroaki, Y., Fujiyoshi, Y., Harrison, S. C. & Walz, T. (2005). *Nature*. **438**, 633–638.
- Gruene, T., Hahn, H. W., Luebben, A. V., Meilleur, F. & Sheldrick, G. M. (2014). *J. Appl. Crystallogr.* **47**, 462–466.
- Gruene, T., Wennmacher, J. T. C., Zaubitzer, C., Holstein, J. J., Heidler, J., Fecteau-Lefebvre, A., De Carlo, S., Müller, E., Goldie, K. N., Regeni, I., Li, T., Santiso-Quinones, G., Steinfeld, G., Handschin, S., van Genderen, E., van Bokhoven, J. A., Clever, G. H. & Pantelic, R. (2018). *Angew. Chem. Int. Ed.* **57**, 16313–16317.
- Guo, H., Franken, E., Deng, Y., Benlekbir, S., Singla Lezcano, G., Janssen, B., Yu, L., Ripstein, Z. A., Tan, Y. Z. & Rubinstein, J. L. (2020). *IUCrJ.* **7**, 860–869.

- 392 Hattne, J., Shi, D., Glynn, C., Zee, C.-T., Gallagher-Jones, M., Martynowycz, M. W., Rodriguez, J. A. & Gonen, T.  
393 (2018). *Structure*. **26**, 759–766.e4.
- 394 Henderson, R. (1995). *Q. Rev. Biophys.* **28**, 171–193.
- 395 Howard, E. I., Sanishvili, R., Cachau, R. E., Mitschler, A., Chevrier, B., Barth, P., Lamour, V., Van Zandt, M.,  
396 Sibley, E., Bon, C., Moras, D., Schneider, T. R., Joachimiak, A. & Podjarny, A. (2004). *Proteins Struct.*  
397 *Funct. Bioinforma.* **55**, 792–804.
- 398 Jones, C. G., Martynowycz, M. W., Hattne, J., Fulton, T. J., Stoltz, B. M., Rodriguez, J. A., Nelson, H. M. & Gonen,  
399 T. (2018). *ACS Cent. Sci.* **4**, 1587–1592.
- 400 Kabsch, W. (2010). *Acta Crystallogr. D Biol. Crystallogr.* **66**, 125–132.
- 401 Kimura, Y., Vassylyev, D. G., Miyazawa, A., Kidera, A., Matsushima, M., Mitsuoka, K., Murata, K., Hirai, T. &  
402 Fujiyoshi, Y. (1997). *Nature*. **389**, 206–211.
- 403 Latychevskaia, T. & Abrahams, J. P. (2019). *Acta Crystallogr. Sect. B Struct. Sci. Cryst. Eng. Mater.* **75**, 523–531.
- 404 Leapman, R. D. & Sun, S. (1995). *Ultramicroscopy*. **59**, 71–79.
- 405 Liu, S. & Gonen, T. (2018). *Commun. Biol.* **1**, 38.
- 406 Maki-Yonekura, S., Kawakami, K., Hamaguchi, T., Takaba, K. & Yonekura, K. (2021). Hydrogen properties and  
407 charges in a sub-1.2 Å resolution cryo-EM structure revealed by a cold field emission beam Biophysics.
- 408 Martynowycz, M. W., Clabbers, M. T. B., Hattne, J. & Gonen, T. (2021). Ab initio phasing macromolecular  
409 structures using electron-counted MicroED data Biochemistry.
- 410 Martynowycz, M. W., Clabbers, M. T. B., Unge, J., Hattne, J. & Gonen, T. (2021). *Proc. Natl. Acad. Sci.* **118**,  
411 e2108884118.
- 412 Martynowycz, M. W., Khan, F., Hattne, J., Abramson, J. & Gonen, T. (2020). *Proc. Natl. Acad. Sci.* **117**, 32380–  
413 32385.
- 414 Martynowycz, M. W., Shiriaeva, A., Ge, X., Hattne, J., Nannenga, B. L., Cherezov, V. & Gonen, T. (2021). *Proc.*  
415 *Natl. Acad. Sci.* **118**, e2106041118.
- 416 McCoy, A. J., Grosse-Kunstleve, R. W., Adams, P. D., Winn, M. D., Storoni, L. C. & Read, R. J. (2007). *J. Appl.*  
417 *Crystallogr.* **40**, 658–674.
- 418 Mitsuoka, K., Hirai, T., Murata, K., Miyazawa, A., Kidera, A., Kimura, Y. & Fujiyoshi, Y. (1999). *J. Mol. Biol.* **286**,  
419 861–882.
- 420 Murshudov, G. N., Skubák, P., Lebedev, A. A., Pannu, N. S., Steiner, R. A., Nicholls, R. A., Winn, M. D., Long, F.  
421 & Vagin, A. A. (2011). *Acta Crystallogr. D Biol. Crystallogr.* **67**, 355–367.
- 422 Nakane, T., Kotecha, A., Sente, A., McMullan, G., Masiulis, S., Brown, P. M. G. E., Grigoras, I. T., Malinauskaite,  
423 L., Malinauskas, T., Miehlung, J., Uchański, T., Yu, L., Karia, D., Pechnikova, E. V., de Jong, E., Keizer,  
424 J., Bischoff, M., McCormack, J., Tiemeijer, P., Hardwick, S. W., Chirgadze, D. Y., Murshudov, G.,  
425 Aricescu, A. R. & Scheres, S. H. W. (2020). *Nature*. **587**, 152–156.
- 426 Nannenga, B. L., Shi, D., Hattne, J., Reyes, F. E. & Gonen, T. (2014). *ELife*. **3**, e03600.
- 427 Nannenga, B. L., Shi, D., Leslie, A. G. W. & Gonen, T. (2014). *Nat. Methods*. **11**, 927–930.

- 428 Ogata, H., Nishikawa, K. & Lubitz, W. (2015). *Nature*. **520**, 571–574.
- 429 Palatinus, L., Brázda, P., Boullay, P., Perez, O., Klementová, M., Petit, S., Eigner, V., Zaarour, M. & Mintova, S.  
430 (2017). *Science*. **355**, 166–169.
- 431 Purdy, M. D., Shi, D., Chrustowicz, J., Hattne, J., Gonen, T. & Yeager, M. (2018). *Proc. Natl. Acad. Sci.* **115**,  
432 13258–13263.
- 433 Rodriguez, J. A., Ivanova, M. I., Sawaya, M. R., Cascio, D., Reyes, F. E., Shi, D., Sangwan, S., Guenther, E. L.,  
434 Johnson, L. M., Zhang, M., Jiang, L., Arbing, M. A., Nannenga, B. L., Hattne, J., Whitelegge, J., Brewster,  
435 A. S., Messerschmidt, M., Boutet, S., Sauter, N. K., Gonen, T. & Eisenberg, D. S. (2015). *Nature*. **525**,  
436 486–490.
- 437 Sawaya, M. R., Rodriguez, J., Cascio, D., Collazo, M. J., Shi, D., Reyes, F. E., Hattne, J., Gonen, T. & Eisenberg,  
438 D. S. (2016). *Proc. Natl. Acad. Sci.* **113**, 11232–11236.
- 439 Takaba, K., Maki-Yonekura, S., Inoue, I., Tono, K., Hamaguchi, T., Kawakami, K., Naitow, H., Ishikawa, T.,  
440 Yabashi, M. & Yonekura, K. (2021). Hydrogen properties in an organic molecule revealed by XFEL and  
441 electron crystallography *Chemistry*.
- 442 Walsh, M. A., Schneider, T. R., Sieker, L. C., Dauter, Z., Lamzin, V. S. & Wilson, K. S. (1998). *Acta Crystallogr. D*  
443 *Biol. Crystallogr.* **54**, 522–546.
- 444 Wang, J., Dauter, M., Alkire, R., Joachimiak, A. & Dauter, Z. (2007). *Acta Crystallogr. D Biol. Crystallogr.* **63**,  
445 1254–1268.
- 446 Williams, C. J., Headd, J. J., Moriarty, N. W., Prisant, M. G., Videau, L. L., Deis, L. N., Verma, V., Keedy, D. A.,  
447 Hintze, B. J., Chen, V. B., Jain, S., Lewis, S. M., Arendall, W. B., Snoeyink, J., Adams, P. D., Lovell, S.  
448 C., Richardson, J. S. & Richardson, D. C. (2018). *Protein Sci.* **27**, 293–315.
- 449 Winn, M. D., Ballard, C. C., Cowtan, K. D., Dodson, E. J., Emsley, P., Evans, P. R., Keegan, R. M., Krissinel, E. B.,  
450 Leslie, A. G. W., McCoy, A., McNicholas, S. J., Murshudov, G. N., Pannu, N. S., Potterton, E. A., Powell,  
451 H. R., Read, R. J., Vagin, A. & Wilson, K. S. (2011). *Acta Crystallogr. D Biol. Crystallogr.* **67**, 235–242.
- 452 Xu, H., Lebrette, H., Clabbers, M. T. B., Zhao, J., Griese, J. J., Zou, X. & Högbom, M. (2019). *Sci. Adv.* **5**,  
453 eaax4621.
- 454 Yamashita, K., Palmer, C. M., Burnley, T. & Murshudov, G. N. (2021). *Acta Crystallogr. Sect. Struct. Biol.* **77**,  
455 1282–1291.
- 456 Yonekura, K., Ishikawa, T. & Maki-Yonekura, S. (2019). *J. Struct. Biol.* **206**, 243–253.
- 457 Yonekura, K., Kato, K., Ogasawara, M., Tomita, M. & Toyoshima, C. (2015). *Proc. Natl. Acad. Sci.* **112**, 3368–  
458 3373.
- 459 Yonekura, K., Matsuoka, R., Yamashita, Y., Yamane, T., Ikeguchi, M., Kidera, A. & Maki-Yonekura, S. (2018).  
460 *IUCrJ.* **5**, 348–353.
- 461
- 462
- 463
- 464
- 465
- 466

467  
468  
469  
470  
471  
472  
473  
474  
475

## 476 Figure legends

477

478 **Figure 1. Hydrogen atoms and bonding interactions in secondary structure elements.** Difference  
479 peaks for individual hydrogen atoms are displayed as green spheres with their  $\sigma$  values shown for (a) two  
480 short anti-parallel  $\beta$ -strands (residues 42-45 and 51-54, respectively), and (b) an  $\alpha$ -helix (residues 88-  
481 101). Hydrogen atoms were assigned from a hydrogen-only omit map for peaks at  $\geq 2.0\sigma$  that are within  
482 0.5 Å distance from their idealized position. Hydrogen bonding interactions are indicated by dashed black  
483 lines and their respective bond distances and angles are listed in Table 2. Electrostatic potential 2mFo-  
484 DFc maps are contoured at  $4.0\sigma$  (blue) and mFo-DFc difference maps are shown at  $2.5\sigma$  (green and red  
485 for positive and negative, respectively). Carbon atoms are shown in brown, nitrogen in blue, and oxygen  
486 in red.

487

488 **Figure 2. Hydrogen atoms and hydrogen-bond networks.** Hydrogen atoms (green difference peaks)  
489 are shown with their  $\sigma$  values for the side chains of different residues and for several water molecules.  
490 Hydrogen atoms were assigned from a hydrogen-only omit map for peaks at  $\geq 2.0\sigma$  and within 0.5 Å from  
491 their idealized positions. (a) Strong difference peaks indicate hydrogen atom positions for His15, as well  
492 as a possible hydrogen bond interaction between His15-NE2 and a neighboring Thr89-OG1. The histidine  
493 residue appears to be protonated at ND1 which is consistent with pH 4.5 of the crystallization condition.  
494 (b) Hydrogen atoms are indicated by difference peaks for two residues, as well as a potential hydrogen  
495 bonding interaction between Tyr53-OH and Asp66-OD1. (c) Acidic side-chains showing well resolved  
496 atoms. Strong difference peaks for side chain hydrogen atoms can be observed in asparagine and  
497 glutamine residues. (d) Illustration of a hydrogen bonding network involving water molecules and several  
498 protein residues. The inset shows the hydrogen bond distances for the water molecules. Electrostatic  
499 potential 2mFo-DFc maps are contoured at (a)  $2.5\sigma$  (blue) and (b-d) at  $3.0\sigma$  (blue), mFo-DFc difference  
500 maps are shown at  $2.3\sigma$  (green and red for positive and negative, respectively). Carbon atoms are shown  
501 in brown, nitrogen in blue, and oxygen in red.

502

503 **Figure 3. Hydrogen bond distances for macromolecular MicroED data.** Hydrogen bond distances in  
504 Å are shown as histogram plots with a normal distribution fitted to the data. Idealized hydrogen bond  
505 lengths between electron cloud centroids used in X-ray diffraction are indicated by a teal dotted line,  
506 idealized inter-nuclei hydrogen bond lengths used in neutron diffraction are indicated by the orange  
507 dotted line (see also Table 1, Supplementary Tables 2, 3, 6–8) (Grüne *et al.*, 2014).

508

509

510

511

512

513  
514  
515  
516  
517  
518  
519  
520  
521  
522  
523

**Table 1. Hydrogen atoms and mean observed hydrogen bond lengths**

| Hydrogen bonds            | No. observations | X-H (Å) <sup>a</sup> | X-H <sub>X-ray</sub> (Å) <sup>b</sup> | X-H <sub>Neutron</sub> (Å) <sup>c</sup> |
|---------------------------|------------------|----------------------|---------------------------------------|-----------------------------------------|
| C <sub>α</sub> -H         | 61               | 1.11(13)             | 0.98                                  | 1.10                                    |
| C <sub>sidechain</sub> -H | 14               | 1.25(18)             | 0.98                                  | 1.10                                    |
| C <sub>aromatic</sub> -H  | 17               | 1.13(12)             | 0.93                                  | 1.08                                    |
| C-H <sub>2</sub>          | 99               | 1.17(15)             | 0.97                                  | 1.09                                    |
| C-H <sub>3</sub>          | 77               | 1.09(17)             | 0.96                                  | 1.06                                    |
| N-H                       | 44               | 1.02(16)             | 0.86                                  | 1.01                                    |
| N-H...O                   | 38               | 1.05(15)             | 0.86                                  | 1.01                                    |
| N-H <sub>2</sub>          | 13               | 1.08(21)             | 0.89                                  | 1.03                                    |
| N-H <sub>3</sub>          | 3                | 1.13(11)             | 0.86                                  | 1.01                                    |
| O-H                       | 10               | 1.13(18)             | 0.82                                  | 0.98                                    |

524  
525  
526  
527  
528  
529  
530  
531  
532  
533  
534  
535  
536  
537  
538

<sup>a</sup> Mean observed hydrogen bond lengths measured for hydrogen atoms difference peaks at  $\geq 2.0\sigma$ , standard deviations are listed in parenthesis. Values for individual hydrogen bond distances are listed in Supplementary Tables 2–10

<sup>b</sup> Idealized hydrogen bond lengths between electron cloud centroids used in X-ray diffraction (Gruene *et al.*, 2014)

<sup>c</sup> Idealized inter-nuclei hydrogen bond lengths used in neutron diffraction (Gruene *et al.*, 2014)

539  
540  
541  
542  
543  
544  
545  
546  
547

**Table 2. Hydrogen bond distances and angles for secondary structure**

| Donor-H•••Acceptor                            | Diff. peak $\sigma$ | D-H (Å) | H•••A (Å) | D•••A (Å) | D-H•••A (°) |
|-----------------------------------------------|---------------------|---------|-----------|-----------|-------------|
| $\beta$ -strands                              |                     |         |           |           |             |
| Asn <sup>44</sup> -N-H•••Asp <sup>52</sup> -O | 3.13                | 1.41    | 1.46      | 2.86      | 170.74      |
| Asp <sup>52</sup> -N-H•••Asn <sup>44</sup> -O | 4.33                | 0.90    | 1.93      | 2.75      | 149.88      |
| Gly <sup>54</sup> -N-H•••Thr <sup>43</sup> -O | 4.48                | 1.10    | 1.59      | 2.67      | 168.44      |
| $\alpha$ -helices                             |                     |         |           |           |             |
| Ala <sup>11</sup> -N-H•••Glu <sup>7</sup> -O  | 2.58                | 0.78    | 2.40      | 2.89      | 122.19      |
| Met <sup>12</sup> -N-H•••Leu <sup>8</sup> -O  | 2.44                | 0.90    | 1.87      | 2.70      | 153.21      |
| Lys <sup>13</sup> -N-H•••Ala <sup>9</sup> -O  | 3.44                | 1.21    | 1.59      | 2.76      | 162.32      |
| Arg <sup>14</sup> -N-H•••Ala <sup>10</sup> -O | 2.39                | 1.08    | 2.02      | 2.82      | 128.88      |
| Val <sup>29</sup> -N-H•••Leu <sup>25</sup> -O | 2.09                | 0.77    | 2.39      | 2.94      | 129.35      |
| Cys <sup>30</sup> -N-H•••Gly <sup>26</sup> -O | 2.45                | 1.00    | 1.85      | 2.74      | 146.82      |
| Ala <sup>31</sup> -N-H•••Asn <sup>27</sup> -O | 3.23                | 1.10    | 1.87      | 2.79      | 138.11      |
| Lys <sup>33</sup> -N-H•••Val <sup>29</sup> -O | 3.03                | 0.86    | 2.01      | 2.81      | 153.99      |
| Phe <sup>34</sup> -N-H•••Cys <sup>30</sup> -O | 3.21                | 0.79    | 2.18      | 2.95      | 169.63      |
| Val <sup>92</sup> -N-H•••Ile <sup>88</sup> -O | 3.00                | 0.98    | 1.79      | 2.77      | 174.55      |
| Asn <sup>93</sup> -N-H•••Thr <sup>89</sup> -O | 3.67                | 0.96    | 1.79      | 2.74      | 168.88      |
| Ala <sup>95</sup> -N-H•••Ser <sup>91</sup> -O | 2.74                | 0.87    | 1.86      | 2.73      | 172.72      |
| Lys <sup>96</sup> -N-H•••Val <sup>92</sup> -O | 4.21                | 1.05    | 1.76      | 2.81      | 174.10      |
| Ile <sup>98</sup> -N-H•••Cys <sup>94</sup> -O | 3.04                | 1.13    | 1.72      | 3.15      | 152.39      |
| Val <sup>99</sup> -N-H•••Ala <sup>95</sup> -O | 3.06                | 1.09    | 1.95      | 3.03      | 171.83      |

548  
549

550  
551  
552  
553  
554  
555  
556  
557  
558

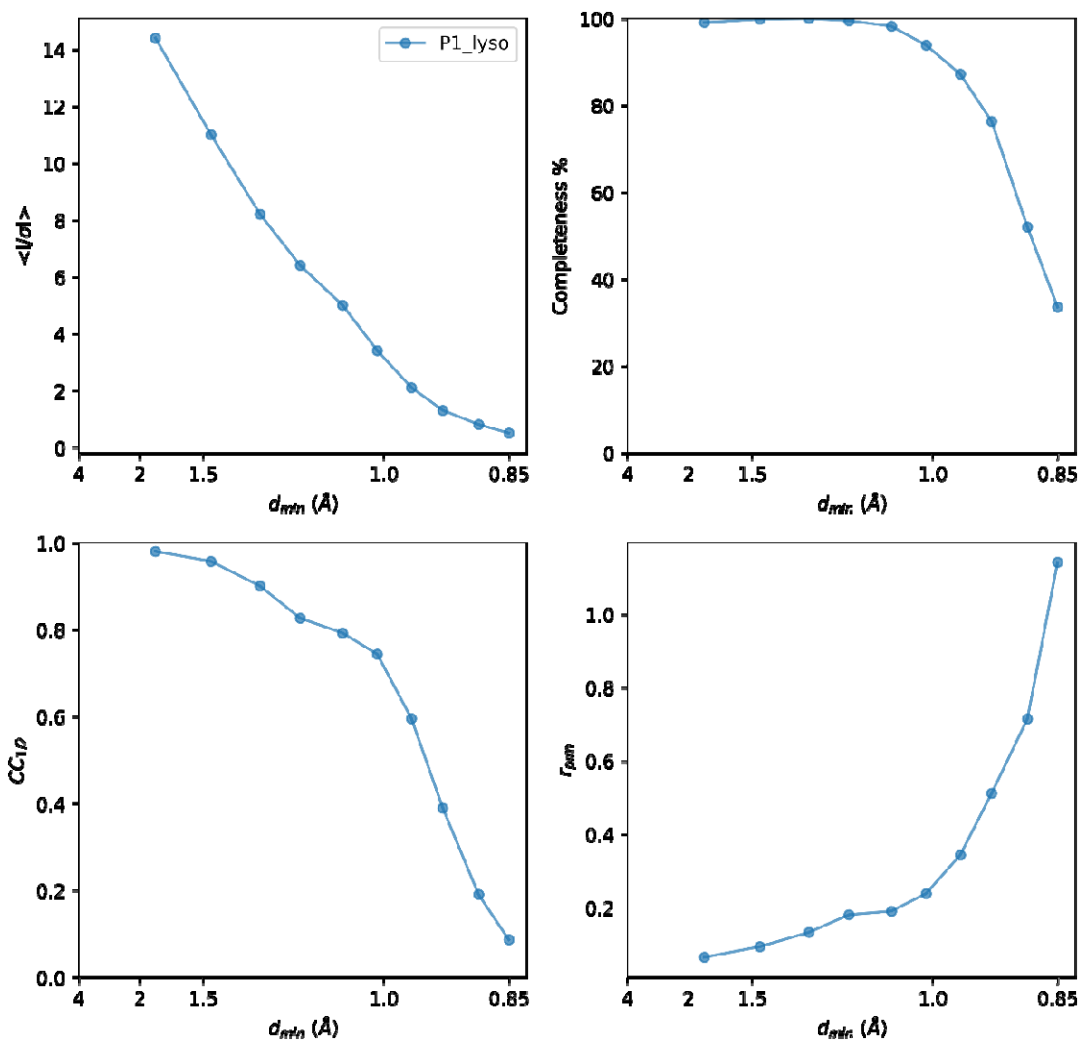

559  
560  
561  
562  
563  
564  
565  
566  
567

**Supplementary Figure 1. Merging statistics for triclinc lysozyme.** Crystallographic quality indicators and data completeness plotted as function of resolution for triclinc lysozyme at 0.87 Å resolution (see Supplementary Table 1).



568  
569  
570  
571  
572  
573  
574  
575  
576  
577  
578

**Supplementary Table 1. MicroED Data collection and refinement statistics**

|                                               |                          |
|-----------------------------------------------|--------------------------|
| <b>Data collection</b> *                      |                          |
| Wavelength                                    | 0.0197                   |
| No. of crystals                               | 16                       |
| Space group                                   | <i>P1</i>                |
| Cell dimensions                               |                          |
| <i>a</i> , <i>b</i> , <i>c</i> (Å)            | 26.42, 30.72, 33.01      |
| $\alpha$ , $\beta$ , $\gamma$ (°)             | 88.32, 109.10, 112.08    |
| Resolution (Å)                                | 16.05-0.87 (0.90-0.87)** |
| Observed reflections                          | 569407 (5797)            |
| Unique reflections                            | 64986 (2783)             |
| Multiplicity                                  | 8.8 (2.1)                |
| Completeness (%)                              | 87.55 (37.64)            |
| $R_{\text{merge}}$                            | 0.236 (1.035)            |
| $R_{\text{meas}}$                             | 0.248 (1.409)            |
| $R_{\text{pim}}$                              | 0.073 (0.945)            |
| Mean $I/\sigma(I)$                            | 6.23 (0.66)              |
| $CC_{1/2}$                                    | 0.990 (0.147)            |
| <b>Refinement</b>                             |                          |
| No. of reflections                            | 64974                    |
| No. of reflections used for $R_{\text{free}}$ | 3168                     |
| $R_{\text{work}} / R_{\text{free}}$           | 0.197 / 0.220            |
| No. of atoms                                  | 1216                     |
| Proteins                                      | 1081                     |
| Ligand                                        | 16                       |
| Water                                         | 119                      |
| R.m.s. deviations                             |                          |
| Bond lengths (Å)                              | 0.034                    |
| Bond angles (°)                               | 2.447                    |
| Mean $B$ -factor (Å <sup>2</sup> )            | 11.98                    |
| Ramachandran                                  |                          |

|                      |       |
|----------------------|-------|
| Favored (%)          | 96.19 |
| Allowed (%)          | 3.81  |
| Outliers (%)         | 0.00  |
| Rotamer outliers (%) | 2.33  |

579 \*Data from Martynowycz, Clabbers, Hattné *et al.*, 2021.

580 \*\*Values in parentheses are for highest-resolution shell.

581

582

583 **Supplementary Table 2. Bond distances and angles for hydrogen bonding interactions**

584

| Donor-H•••Acceptor                                | Diff. peak $\sigma$ | D-H (Å) | H•••A (Å) | D•••A (Å) | D-H•••A (°) |
|---------------------------------------------------|---------------------|---------|-----------|-----------|-------------|
| Phe <sup>3</sup> -N-H•••Phe <sup>38</sup> -O      | 2.50                | 1.18    | 1.67      | 2.81      | 160.72      |
| Ala <sup>11</sup> -N-H•••Glu <sup>7</sup> -O      | 2.58                | 0.78    | 2.40      | 2.89      | 122.19      |
| Met <sup>12</sup> -N-H•••Leu <sup>8</sup> -O      | 2.44                | 0.90    | 1.87      | 2.70      | 153.21      |
| Lys <sup>13</sup> -N-H•••Ala <sup>9</sup> -O      | 3.44                | 1.21    | 1.59      | 2.76      | 162.32      |
| Arg <sup>14</sup> -N-H•••Ala <sup>10</sup> -O     | 2.39                | 1.08    | 2.02      | 2.82      | 128.88      |
| His <sup>15</sup> -NE2-H•••Thr <sup>89</sup> -OG1 | 2.39                | 1.27    | 1.33      | 2.59      | 162.48      |
| Leu <sup>17</sup> -N-H•••Met <sup>12</sup> -O     | 2.91                | 1.11    | 1.92      | 2.99      | 162.18      |
| Tyr <sup>20</sup> -N-H•••Leu <sup>17</sup> -O     | 2.78                | 1.06    | 1.98      | 2.92      | 146.41      |
| Val <sup>29</sup> -N-H•••Leu <sup>25</sup> -O     | 2.09                | 0.77    | 2.39      | 2.94      | 129.35      |
| Cys <sup>30</sup> -N-H•••Gly <sup>26</sup> -O     | 2.45                | 1.00    | 1.85      | 2.74      | 146.82      |
| Ala <sup>31</sup> -N-H•••Asn <sup>27</sup> -O     | 3.23                | 1.10    | 1.87      | 2.79      | 138.11      |
| Lys <sup>33</sup> -N-H•••Val <sup>29</sup> -O     | 3.03                | 0.86    | 2.01      | 2.81      | 153.99      |
| Phe <sup>34</sup> -N-H•••Cys <sup>30</sup> -O     | 3.21                | 0.79    | 2.18      | 2.95      | 169.63      |
| Thr <sup>40</sup> -N-H•••Lys <sup>1</sup> -O      | 3.03                | 1.08    | 1.77      | 2.75      | 147.63      |
| Ala <sup>42</sup> -N-H•••Asn <sup>39</sup> -O     | 3.27                | 1.20    | 1.77      | 2.89      | 154.32      |
| Asn <sup>44</sup> -N-H•••Asp <sup>52</sup> -O     | 3.12                | 1.41    | 1.46      | 2.86      | 170.74      |
| Asn <sup>46</sup> -N-H•••Ser <sup>50</sup> -O     | 2.56                | 1.21    | 1.63      | 2.73      | 148.76      |
| Asp <sup>52</sup> -N-H•••Asn <sup>44</sup> -O     | 4.33                | 0.90    | 1.93      | 2.75      | 149.88      |
| Tyr <sup>53</sup> -O-H•••Asp <sup>66</sup> -OD2   | 3.44                | 1.39    | 1.25      | 2.59      | 157.86      |
| Gly <sup>54</sup> -N-H•••Thr <sup>43</sup> -O     | 4.48                | 1.10    | 1.59      | 2.67      | 168.44      |
| Gln <sup>57</sup> -N-H•••Gly <sup>54</sup> -O     | 3.01                | 1.11    | 1.83      | 2.84      | 150.17      |
| Asn <sup>65</sup> -N-H•••Leu <sup>78</sup> -O     | 2.74                | 0.91    | 1.87      | 2.77      | 159.36      |
| Gly <sup>67</sup> -N-H•••Asn <sup>65</sup> -O     | 3.90                | 1.13    | 1.85      | 2.90      | 152.42      |
| Arg <sup>73</sup> -N-H•••Arg <sup>61</sup> -O     | 3.77                | 1.17    | 1.74      | 2.80      | 147.11      |
| Leu <sup>75</sup> -N-H•••Trp <sup>62</sup> -O     | 2.86                | 0.84    | 1.93      | 2.75      | 161.86      |
| Ser <sup>81</sup> -N-H•••NO3 <sup>201</sup> -O    | 2.92                | 1.07    | 1.8       | 2.76      | 146.94      |
| Ala <sup>82</sup> -N-H•••Pro <sup>70</sup> -O     | 2.16                | 1.18    | 1.71      | 2.79      | 148.60      |
| Leu <sup>83</sup> -N-H•••Cys <sup>80</sup> -O     | 2.32                | 1.04    | 1.77      | 2.73      | 150.33      |
| Leu <sup>84</sup> -N-H•••Ser <sup>81</sup> -O     | 2.99                | 1.03    | 1.92      | 2.93      | 164.49      |
| Val <sup>92</sup> -N-H•••Ile <sup>88</sup> -O     | 3.00                | 0.98    | 1.79      | 2.77      | 174.55      |
| Asn <sup>93</sup> -N-H•••Thr <sup>89</sup> -O     | 3.67                | 0.96    | 1.79      | 2.74      | 168.89      |
| Ala <sup>95</sup> -N-H•••Ser <sup>91</sup> -O     | 2.74                | 0.87    | 1.86      | 2.73      | 172.72      |

|                                                    |      |      |      |      |        |
|----------------------------------------------------|------|------|------|------|--------|
| Lys <sup>96</sup> -N-H•••Val <sup>92</sup> -O      | 4.21 | 1.05 | 1.76 | 2.81 | 174.10 |
| Ile <sup>98</sup> -N-H•••Cys <sup>94</sup> -O      | 3.04 | 1.13 | 1.72 | 3.15 | 152.39 |
| Val <sup>99</sup> -N-H•••Ala <sup>95</sup> -O      | 3.06 | 1.09 | 1.95 | 3.03 | 171.83 |
| Trp <sup>108</sup> -N-H•••Met <sup>105</sup> -O    | 3.10 | 1.26 | 1.64 | 2.82 | 152.36 |
| Trp <sup>111</sup> -NE1-H•••Asn <sup>27</sup> -OD1 | 3.39 | 1.02 | 1.79 | 2.71 | 169.48 |
| Arg <sup>114</sup> -N-H•••Arg <sup>110</sup> -O    | 2.27 | 1.11 | 1.98 | 2.76 | 124.52 |
| Trp <sup>123</sup> -N-H•••Val <sup>120</sup> -O    | 2.45 | 1.04 | 1.83 | 2.84 | 161.33 |

585

586 **Supplementary Table 3. Hydrogen bond distances for C $\alpha$ -H**

587

| Residue | Name | Atom | Diff. peak $\sigma$ | X-H (Å) |
|---------|------|------|---------------------|---------|
| 2       | Val  | CA   | 3.42                | 1.15    |
| 3       | Phe  | CA   | 3.46                | 1.26    |
| 4       | Gly  | CA   | 3.18                | 1.14    |
| 4       | Gly  | CA   | 2.39                | 0.98    |
| 5       | Arg  | CA   | 2.59                | 1.27    |
| 7       | Glu  | CA   | 4.16                | 1.06    |
| 9       | Ala  | CA   | 3.79                | 1.08    |
| 10      | Ala  | CA   | 2.74                | 1.00    |
| 11      | Ala  | CA   | 2.78                | 0.81    |
| 12      | Met  | CA   | 2.74                | 1.11    |
| 13      | Lys  | CA   | 2.01                | 1.20    |
| 16      | Gly  | CA   | 2.60                | 0.89    |
| 18      | Asp  | CA   | 2.26                | 1.45    |
| 19      | Asn  | CA   | 2.81                | 1.43    |
| 20      | Tyr  | CA   | 3.17                | 1.10    |
| 21      | Arg  | CA   | 3.12                | 1.29    |
| 22      | Gly  | CA   | 2.77                | 1.18    |
| 24      | Ser  | CA   | 3.96                | 1.10    |
| 25      | Leu  | CA   | 3.06                | 1.19    |
| 27      | Asn  | CA   | 3.22                | 1.16    |
| 28      | Trp  | CA   | 3.34                | 1.10    |
| 29      | Val  | CA   | 2.42                | 1.10    |
| 32      | Ala  | CA   | 2.39                | 1.05    |
| 33      | Lys  | CA   | 2.71                | 1.05    |
| 38      | Phe  | CA   | 2.41                | 1.18    |
| 39      | Asn  | CA   | 2.96                | 0.99    |
| 42      | Ala  | CA   | 2.17                | 0.83    |
| 44      | Asn  | CA   | 2.16                | 0.90    |
| 45      | Arg  | CA   | 2.81                | 0.98    |
| 51      | Thr  | CA   | 3.55                | 0.90    |
| 52      | Asp  | CA   | 3.04                | 1.20    |
| 53      | Tyr  | CA   | 2.27                | 1.14    |
| 54      | Gly  | CA   | 3.43                | 1.17    |
| 55      | Ile  | CA   | 2.63                | 1.12    |
| 56      | Ile  | CA   | 2.85                | 1.25    |
| 57      | Asn  | CA   | 2.89                | 1.23    |
| 58      | Ile  | CA   | 3.49                | 0.97    |
| 59      | Asn  | CA   | 3.51                | 1.06    |
| 62      | Trp  | CA   | 2.78                | 1.18    |
| 63      | Trp  | CA   | 2.29                | 1.25    |

|     |     |    |      |      |
|-----|-----|----|------|------|
| 69  | Thr | CA | 2.61 | 1.00 |
| 70  | Pro | CA | 2.91 | 1.06 |
| 74  | Asn | CA | 3.22 | 1.03 |
| 75  | Leu | CA | 2.65 | 1.13 |
| 76  | Cys | CA | 2.76 | 1.08 |
| 77  | Asn | CA | 2.87 | 1.13 |
| 82  | Ala | CA | 3.27 | 1.09 |
| 88  | Ile | CA | 2.64 | 1.41 |
| 91  | Ser | CA | 4.18 | 1.40 |
| 94  | Cys | CA | 2.89 | 1.02 |
| 96  | Lys | CA | 2.80 | 1.05 |
| 97  | Lys | CA | 2.38 | 1.24 |
| 99  | Val | CA | 3.06 | 1.15 |
| 103 | Asn | CA | 2.14 | 1.17 |
| 108 | Trp | CA | 4.03 | 0.94 |
| 110 | Ala | CA | 3.41 | 1.06 |
| 111 | Trp | CA | 2.44 | 1.10 |
| 116 | Lys | CA | 2.93 | 1.11 |
| 117 | Gly | CA | 4.02 | 1.11 |
| 119 | Asp | CA | 3.19 | 1.07 |
| 123 | Trp | CA | 2.60 | 1.14 |

588  
589  
590  
591  
592  
593  
594  
595  
596  
597  
598  
599  
600  
601  
602  
603  
604  
605  
606  
607  
608  
609  
610  
611  
612  
613

614  
615  
616  
617  
618  
619  
620  
621  
622  
623

**Supplementary Table 4. Hydrogen bond distances for side chain C-H**

| Residue | Name | Atom | Diff. peak $\sigma$ | X-H (Å) |
|---------|------|------|---------------------|---------|
| 8       | Leu  | CG   | 2.50                | 0.94    |
| 15      | His  | CE1  | 2.50                | 1.45    |
| 40      | Thr  | CB   | 2.64                | 1.51    |
| 56      | Leu  | CG   | 3.74                | 1.22    |
| 58      | Ile  | CB   | 3.35                | 1.18    |
| 63      | Trp  | CD1  | 3.06                | 1.39    |
| 69      | Thr  | CB   | 3.08                | 0.99    |
| 84      | Leu  | CG   | 2.88                | 1.29    |
| 89      | Thr  | CB   | 3.24                | 1.25    |
| 98      | Ile  | CB   | 2.19                | 1.06    |
| 108     | Trp  | CD1  | 2.84                | 1.25    |
| 109     | Val  | CB   | 2.36                | 1.51    |
| 118     | Thr  | CB   | 3.39                | 1.29    |
| 123     | Trp  | CD1  | 2.44                | 1.19    |

624  
625  
626  
627  
628  
629  
630  
631  
632  
633  
634  
635  
636  
637  
638  
639  
640  
641  
642  
643  
644

645  
646  
647  
648  
649  
650  
651  
652  
653  
654

**Supplementary Table 5. Hydrogen bond distances for aromatic C-H**

| Residue | Name | Atom | Diff. peak $\sigma$ | X-H (Å) |
|---------|------|------|---------------------|---------|
| 3       | Phe  | CE2  | 3.12                | 1.05    |
| 20      | Tyr  | CE1  | 3.09                | 0.99    |
| 23      | Tyr  | CD2  | 4.18                | 1.01    |
| 23      | Tyr  | CD1  | 2.81                | 1.11    |
| 23      | Tyr  | CE1  | 2.15                | 1.32    |
| 38      | Phe  | CZ   | 3.97                | 1.13    |
| 38      | Phe  | CE2  | 2.56                | 1.32    |
| 38      | Phe  | CD1  | 2.11                | 1.03    |
| 53      | Tyr  | CD1  | 3.52                | 1.18    |
| 53      | Tyr  | CE2  | 3.39                | 1.16    |
| 63      | Trp  | CZ3  | 3.51                | 1.00    |
| 63      | Trp  | CE3  | 3.19                | 1.22    |
| 108     | Trp  | CE3  | 3.86                | 1.07    |
| 108     | Trp  | CH2  | 3.47                | 1.01    |
| 108     | Trp  | CZ3  | 2.42                | 1.31    |
| 111     | Trp  | CH2  | 3.52                | 1.24    |
| 111     | Trp  | CZ2  | 2.30                | 1.02    |

655  
656  
657  
658  
659  
660  
661  
662  
663  
664  
665  
666  
667  
668  
669  
670  
671  
672  
673

674  
675  
676  
677  
678  
679  
680  
681  
682  
683

**Supplementary Table 6. Hydrogen bond distances for CH<sub>2</sub>**

| Residue | Name | Atom | Diff. peak $\sigma$ | X-H (Å) |
|---------|------|------|---------------------|---------|
| 1       | Lys  | CE   | 3.20                | 1.41    |
| 1       | Lys  | CE   | 2.30                | 1.17    |
| 1       | Lys  | CG   | 3.15                | 1.05    |
| 1       | Lys  | CB   | 3.12                | 1.16    |
| 3       | Phe  | CB   | 3.37                | 0.98    |
| 3       | Phe  | CB   | 2.43                | 1.14    |
| 5       | Arg  | CB   | 3.12                | 1.23    |
| 5       | Arg  | CB   | 2.81                | 1.46    |
| 5       | Arg  | CG   | 2.20                | 1.14    |
| 6       | Cys  | CB   | 2.37                | 1.04    |
| 7       | Glu  | CB   | 2.42                | 1.58    |
| 8       | Leu  | CB   | 2.45                | 1.03    |
| 8       | Leu  | CB   | 2.43                | 1.10    |
| 12      | Met  | CG   | 3.12                | 1.18    |
| 14      | Arg  | CG   | 3.82                | 1.00    |
| 15      | His  | CB   | 2.07                | 1.16    |
| 18      | Asp  | CB   | 2.84                | 1.00    |
| 18      | Asp  | CB   | 2.29                | 1.21    |
| 19      | Asn  | CB   | 3.04                | 1.01    |
| 19      | Asn  | CB   | 2.48                | 1.06    |
| 20      | Tyr  | CB   | 2.43                | 1.06    |
| 20      | Tyr  | CB   | 2.20                | 1.07    |
| 21      | Arg  | CG   | 3.36                | 1.17    |
| 21      | Arg  | CB   | 2.38                | 1.16    |
| 21      | Arg  | CB   | 2.16                | 1.47    |
| 23      | Trp  | CB   | 2.80                | 1.14    |
| 25      | Leu  | CB   | 3.22                | 1.08    |
| 27      | Asn  | CB   | 2.69                | 0.91    |
| 28      | Trp  | CB   | 2.19                | 1.06    |
| 33      | Lys  | CE   | 3.45                | 1.07    |
| 33      | Lys  | CG   | 3.11                | 1.08    |
| 33      | Lys  | CG   | 2.27                | 1.13    |
| 34      | Phe  | CB   | 4.37                | 1.18    |
| 35      | Glu  | CG   | 3.11                | 1.17    |
| 35      | Glu  | CG   | 2.53                | 1.34    |
| 36      | Ser  | CB   | 3.51                | 1.09    |
| 36      | Ser  | CB   | 2.63                | 1.51    |
| 38      | Phe  | CB   | 3.14                | 1.06    |
| 41      | Gln  | CB   | 3.12                | 1.19    |
| 41      | Gln  | CB   | 2.76                | 1.00    |

|     |     |     |      |      |
|-----|-----|-----|------|------|
| 41  | Gln | CG  | 2.48 | 1.10 |
| 48  | Asp | CB  | 2.11 | 1.29 |
| 57  | Gln | CB  | 3.45 | 1.18 |
| 57  | Gln | CB  | 2.49 | 1.19 |
| 58  | Ile | CG1 | 3.79 | 1.23 |
| 58  | Ile | CG1 | 2.79 | 1.12 |
| 59  | Asn | CB  | 3.11 | 1.15 |
| 59  | Asn | CB  | 2.52 | 1.06 |
| 60  | Ser | CB  | 3.67 | 1.30 |
| 61  | Arg | CB  | 4.18 | 1.04 |
| 61  | Arg | CB  | 2.59 | 0.91 |
| 61  | Arg | CG  | 2.40 | 1.47 |
| 62  | Trp | CB  | 3.11 | 1.25 |
| 63  | Trp | CB  | 2.97 | 1.29 |
| 63  | Trp | CB  | 2.34 | 1.29 |
| 64  | Cys | CB  | 2.55 | 1.07 |
| 66  | Asp | CB  | 2.69 | 1.19 |
| 66  | Asp | CB  | 2.26 | 1.43 |
| 68  | Arg | CB  | 4.31 | 1.16 |
| 70  | Pro | CB  | 2.76 | 1.27 |
| 72  | Ser | CB  | 2.04 | 1.14 |
| 73  | Arg | CB  | 2.22 | 1.18 |
| 74  | Asn | CB  | 2.46 | 1.16 |
| 74  | Asn | CB  | 2.14 | 1.27 |
| 75  | Leu | CB  | 2.82 | 1.35 |
| 76  | Cys | CB  | 3.12 | 0.76 |
| 76  | Cys | CB  | 3.07 | 1.21 |
| 77  | Asn | CB  | 2.76 | 1.08 |
| 78  | Ile | CG1 | 2.13 | 1.05 |
| 80  | Cys | CB  | 3.14 | 0.99 |
| 80  | Cys | CB  | 2.60 | 1.31 |
| 83  | Leu | CB  | 2.57 | 1.01 |
| 84  | Leu | CB  | 2.72 | 1.23 |
| 85  | Ser | CB  | 2.37 | 1.28 |
| 86  | Ser | CB  | 2.91 | 1.22 |
| 87  | Asp | CB  | 3.81 | 1.20 |
| 88  | Ile | CG1 | 2.16 | 1.34 |
| 91  | Ser | CB  | 2.86 | 0.95 |
| 91  | Ser | CB  | 2.10 | 1.16 |
| 93  | Asn | CB  | 3.61 | 1.40 |
| 93  | Asn | CB  | 2.59 | 1.15 |
| 94  | Cys | CB  | 3.46 | 1.08 |
| 94  | Cys | CB  | 2.50 | 1.20 |
| 96  | Lys | CB  | 3.05 | 0.90 |
| 97  | Lys | CD  | 4.05 | 1.25 |
| 97  | Lys | CG  | 3.62 | 1.07 |
| 97  | Lys | CG  | 2.88 | 1.26 |
| 97  | Lys | CD2 | 2.97 | 1.30 |
| 97  | Lys | CD2 | 2.65 | 1.18 |
| 97  | Lys | CB  | 2.60 | 0.82 |
| 100 | Ser | CB  | 3.19 | 1.24 |
| 105 | Met | CB  | 2.62 | 1.42 |
| 105 | Met | CG  | 2.35 | 1.23 |



|     |     |    |      |      |
|-----|-----|----|------|------|
| 108 | Trp | CB | 3.41 | 1.17 |
| 114 | Arg | CB | 2.26 | 1.16 |
| 116 | Lys | CE | 3.61 | 1.23 |
| 121 | Gln | CB | 2.77 | 1.04 |
| 121 | Gln | CB | 2.50 | 1.23 |
| 123 | Trp | CB | 2.11 | 1.41 |

684

685

686

687

688 **Supplementary Table 7. Hydrogen bond distances for CH<sub>3</sub>**

689

| Residue | Name | Atom | Diff. peak $\sigma$ | X-H (Å) |
|---------|------|------|---------------------|---------|
| 2       | Val  | CG1  | 3.42                | 0.94    |
| 2       | Val  | CG1  | 2.23                | 1.15    |
| 2       | Val  | CG2  | 3.04                | 1.31    |
| 2       | Val  | CG2  | 2.63                | 1.11    |
| 8       | Leu  | CD1  | 3.59                | 1.20    |
| 8       | Leu  | CD1  | 3.12                | 0.99    |
| 9       | Ala  | CB   | 2.93                | 1.00    |
| 10      | Ala  | CB   | 3.73                | 1.12    |
| 10      | Ala  | CB   | 2.89                | 1.54    |
| 10      | Ala  | CB   | 2.56                | 1.03    |
| 12      | Met  | CE   | 3.02                | 1.14    |
| 12      | Met  | CE   | 2.27                | 1.11    |
| 17      | Leu  | CD2  | 2.75                | 0.99    |
| 17      | Leu  | CD1  | 2.52                | 0.90    |
| 25      | Leu  | CD2  | 3.61                | 0.87    |
| 25      | Leu  | CD2  | 3.04                | 1.12    |
| 25      | Leu  | CD1  | 2.31                | 1.03    |
| 29      | Val  | CG1  | 3.91                | 0.99    |
| 29      | Val  | CG1  | 2.92                | 1.40    |
| 29      | Val  | CG2  | 2.42                | 1.06    |
| 31      | Ala  | CB   | 2.64                | 0.91    |
| 31      | Ala  | CB   | 2.47                | 1.05    |
| 31      | Ala  | CB   | 2.53                | 0.87    |
| 32      | Ala  | CB   | 2.63                | 0.90    |
| 40      | Thr  | CG2  | 2.99                | 1.28    |
| 42      | Ala  | CB   | 2.71                | 0.94    |
| 51      | Thr  | CG2  | 3.29                | 1.18    |
| 51      | Thr  | CG2  | 2.31                | 1.12    |
| 55      | Ile  | CD1  | 2.71                | 1.12    |
| 55      | Ile  | CD1  | 2.30                | 1.20    |
| 55      | Ile  | CG2  | 2.54                | 0.97    |
| 56      | Leu  | CD1  | 3.20                | 1.35    |
| 56      | Leu  | CD1  | 2.52                | 1.06    |
| 56      | Leu  | CD1  | 2.56                | 1.31    |
| 56      | Leu  | CD2  | 2.67                | 0.99    |
| 56      | Leu  | CD2  | 2.47                | 1.14    |
| 58      | Ile  | CD1  | 2.82                | 1.09    |
| 58      | Ile  | CD1  | 2.54                | 1.09    |
| 58      | Ile  | CG2  | 3.20                | 1.26    |

|     |     |            |      |      |
|-----|-----|------------|------|------|
| 58  | Ile | CG2        | 3.00 | 0.87 |
| 69  | Thr | CG2        | 2.05 | 1.21 |
| 75  | Leu | CD1        | 3.45 | 1.08 |
| 75  | Leu | CD1        | 2.35 | 0.89 |
| 75  | Leu | CD2        | 2.27 | 0.95 |
| 78  | Ile | CG2        | 3.55 | 1.27 |
| 78  | Ile | CG2        | 2.34 | 1.25 |
| 82  | Ala | CB         | 3.39 | 0.89 |
| 82  | Ala | CB         | 3.12 | 1.04 |
| 83  | Leu | CD2        | 2.34 | 1.36 |
| 84  | Leu | <u>CD2</u> | 3.58 | 1.18 |
| 84  | Leu | <u>CD1</u> | 2.80 | 1.02 |
| 88  | Ile | CD1        | 3.97 | 1.27 |
| 88  | Ile | CD1        | 2.12 | 1.36 |
| 88  | Ile | CG2        | 2.43 | 1.09 |
| 88  | Ile | CG2        | 2.21 | 1.16 |
| 90  | Ala | CB         | 4.32 | 1.13 |
| 92  | Val | CG2        | 3.67 | 0.92 |
| 92  | Val | CG2        | 3.34 | 0.81 |
| 92  | Val | CG2        | 3.08 | 1.02 |
| 95  | Ala | CB         | 2.63 | 1.02 |
| 95  | Ala | CB         | 2.19 | 0.96 |
| 98  | Ile | CD1        | 3.03 | 1.19 |
| 98  | Ile | CD1        | 2.15 | 0.79 |
| 99  | Val | CG2        | 2.93 | 1.13 |
| 99  | Val | CG2        | 2.79 | 1.07 |
| 105 | Met | CE         | 3.46 | 1.16 |
| 107 | Ala | CB         | 2.74 | 1.32 |
| 110 | Ala | CB         | 2.43 | 1.39 |
| 110 | Ala | CB         | 2.03 | 0.96 |
| 118 | Thr | CG2        | 2.09 | 1.03 |
| 120 | Val | CG2        | 3.01 | 1.08 |
| 120 | Val | CG2        | 2.09 | 0.76 |
| 120 | Val | CG1        | 2.42 | 1.59 |
| 122 | Ala | CB         | 2.64 | 1.17 |
| 122 | Ala | CB         | 2.03 | 1.14 |
| 124 | Ile | CG2        | 2.79 | 0.98 |
| 124 | Ile | CG2        | 2.67 | 0.65 |

690

691

692

693

694

695

696

697

698

699

700

701

702  
703  
704  
705  
706  
707  
708  
709  
710  
711  
712

**Supplementary Table 8. Hydrogen bond distances for N-H**

| Residue | Name | Atom | Diff. peak $\sigma$ | X-H (Å) |
|---------|------|------|---------------------|---------|
| 4       | Gly  | N    | 3.10                | 0.94    |
| 6       | Cys  | N    | 2.34                | 1.24    |
| 7       | Glu  | N    | 2.72                | 0.87    |
| 14      | Arg  | NE1  | 2.47                | 1.19    |
| 18      | Asp  | N    | 2.90                | 0.91    |
| 21      | Arg  | N    | 3.12                | 1.26    |
| 22      | Gly  | N    | 3.94                | 0.80    |
| 23      | Tyr  | N    | 4.43                | 1.13    |
| 25      | Leu  | N    | 2.62                | 0.93    |
| 26      | Gly  | N    | 3.30                | 1.00    |
| 37      | Asn  | N    | 2.66                | 1.09    |
| 38      | Phe  | N    | 2.98                | 1.18    |
| 39      | Asn  | N    | 3.20                | 1.14    |
| 45      | Arg  | N    | 2.35                | 0.75    |
| 49      | Gly  | N    | 2.70                | 0.98    |
| 55      | Ile  | N    | 2.70                | 0.88    |
| 56      | Ile  | N    | 2.72                | 1.21    |
| 58      | Ile  | N    | 3.27                | 1.08    |
| 60      | Ser  | N    | 3.37                | 0.91    |
| 61      | Arg  | N    | 4.43                | 0.94    |
| 62      | Trp  | N    | 2.96                | 0.81    |
| 62      | Trp  | NE1  | 2.35                | 1.11    |
| 71      | Gly  | N    | 2.21                | 1.12    |
| 72      | Ser  | N    | 2.27                | 1.07    |
| 74      | Asn  | N    | 2.06                | 0.73    |
| 76      | Cys  | N    | 2.76                | 1.19    |
| 78      | Ile  | N    | 2.58                | 0.85    |
| 80      | Cys  | N    | 2.11                | 0.98    |
| 86      | Ser  | N    | 2.12                | 1.12    |
| 88      | Ile  | N    | 2.09                | 0.91    |
| 89      | Thr  | N    | 4.00                | 1.14    |
| 90      | Ala  | N    | 3.27                | 1.13    |
| 91      | Ser  | N    | 2.14                | 0.99    |
| 104     | Gly  | N    | 2.87                | 1.24    |
| 105     | Met  | N    | 2.64                | 1.25    |
| 107     | Ala  | N    | 3.15                | 0.71    |
| 108     | Trp  | NE1  | 2.37                | 1.14    |
| 109     | Val  | N    | 3.68                | 0.81    |
| 111     | Trp  | N    | 3.22                | 1.21    |

|     |     |   |      |      |
|-----|-----|---|------|------|
| 118 | Thr | N | 4.54 | 1.02 |
| 119 | Asp | N | 2.50 | 1.26 |
| 120 | Val | N | 3.86 | 1.16 |
| 121 | Asn | N | 2.50 | 0.88 |
| 124 | Ile | N | 3.53 | 0.84 |

713

714

715

716

717

718 **Supplementary Table 9. Hydrogen bond distances for N-H<sub>2</sub>**

719

| Residue | Name | Atom | Diff. peak $\sigma$ | X-H (Å) |
|---------|------|------|---------------------|---------|
| 5       | Arg  | NH1  | 2.43                | 1.14    |
| 14      | Arg  | NH2  | 2.96                | 0.76    |
| 14      | Arg  | NH1  | 2.93                | 1.26    |
| 19      | Asn  | ND2  | 2.63                | 1.31    |
| 19      | Asn  | ND2  | 2.37                | 1.14    |
| 27      | Asn  | ND2  | 3.07                | 0.87    |
| 27      | Asn  | ND2  | 2.00                | 1.13    |
| 39      | Asn  | ND2  | 2.18                | 1.17    |
| 57      | Gln  | NE2  | 2.80                | 1.00    |
| 59      | Asn  | ND2  | 2.21                | 0.75    |
| 62      | Arg  | NH1  | 2.42                | 1.10    |
| 74      | Asn  | ND2  | 3.40                | 1.50    |
| 114     | Arg  | NH1  | 2.07                | 0.92    |

720

721

722 **Supplementary Table 10. Hydrogen bond distances for N-H<sub>3</sub>**

723

| Residue | Name | Atom | Diff. peak $\sigma$ | X-H (Å) |
|---------|------|------|---------------------|---------|
| 1       | Lys  | NZ   | 3.32                | 1.24    |
| 33      | Lys  | NZ   | 2.70                | 1.13    |
| 97      | Lys  | NZ   | 2.96                | 1.02    |

724

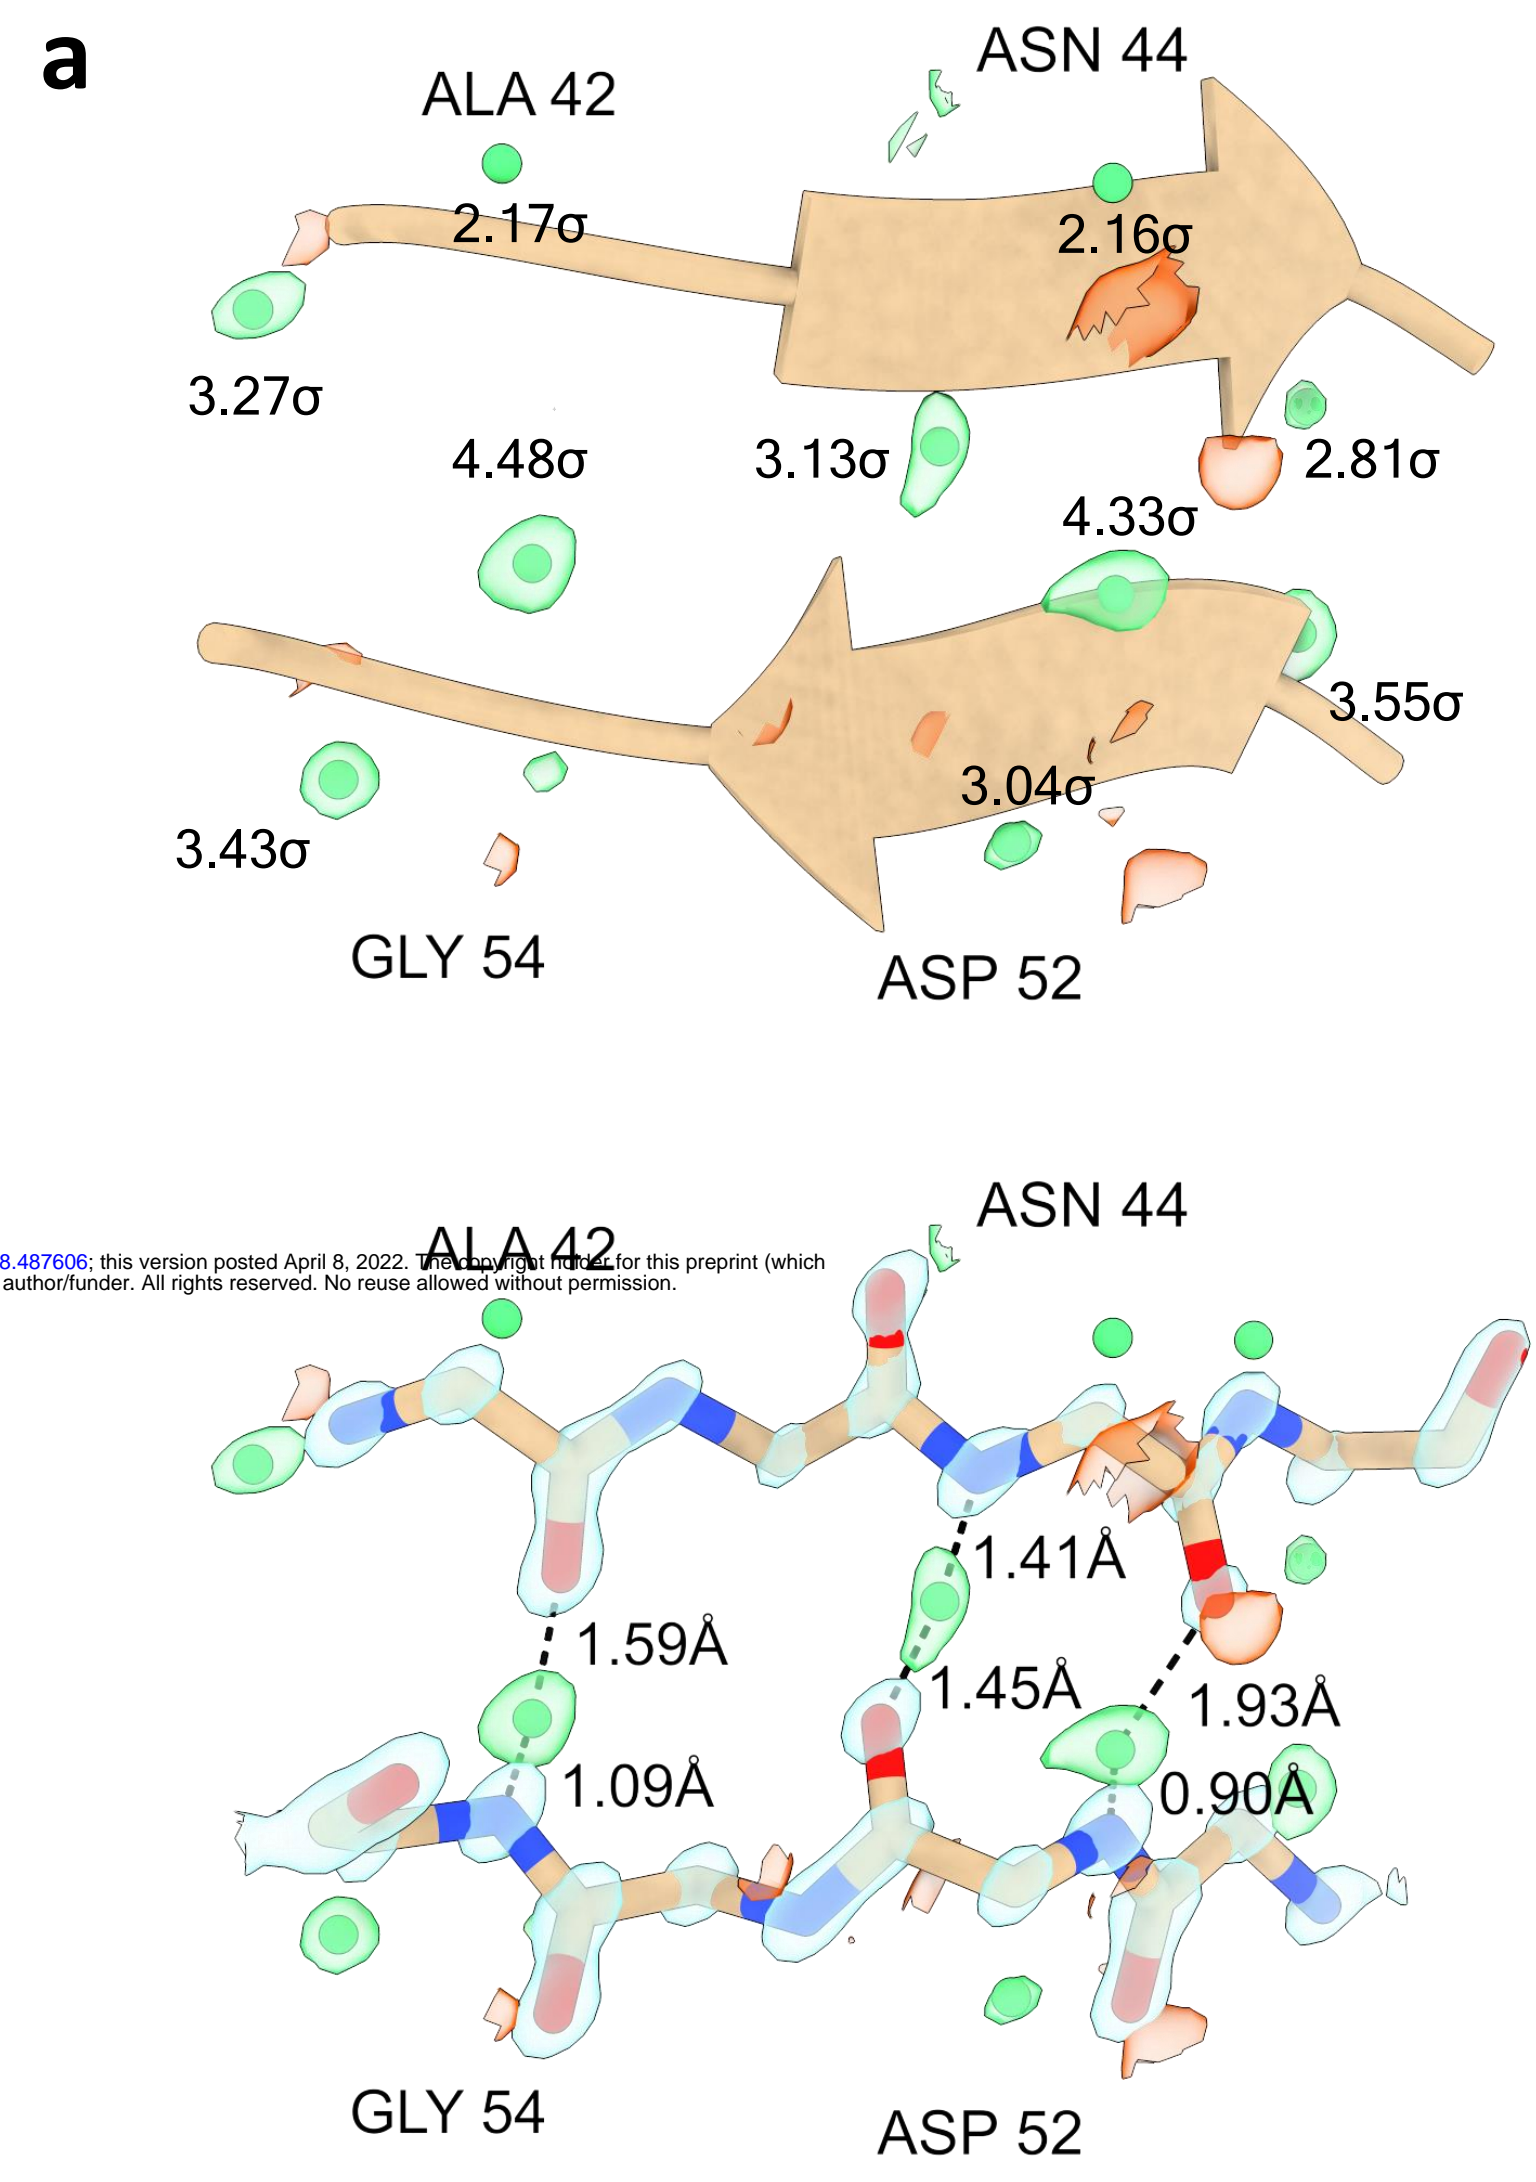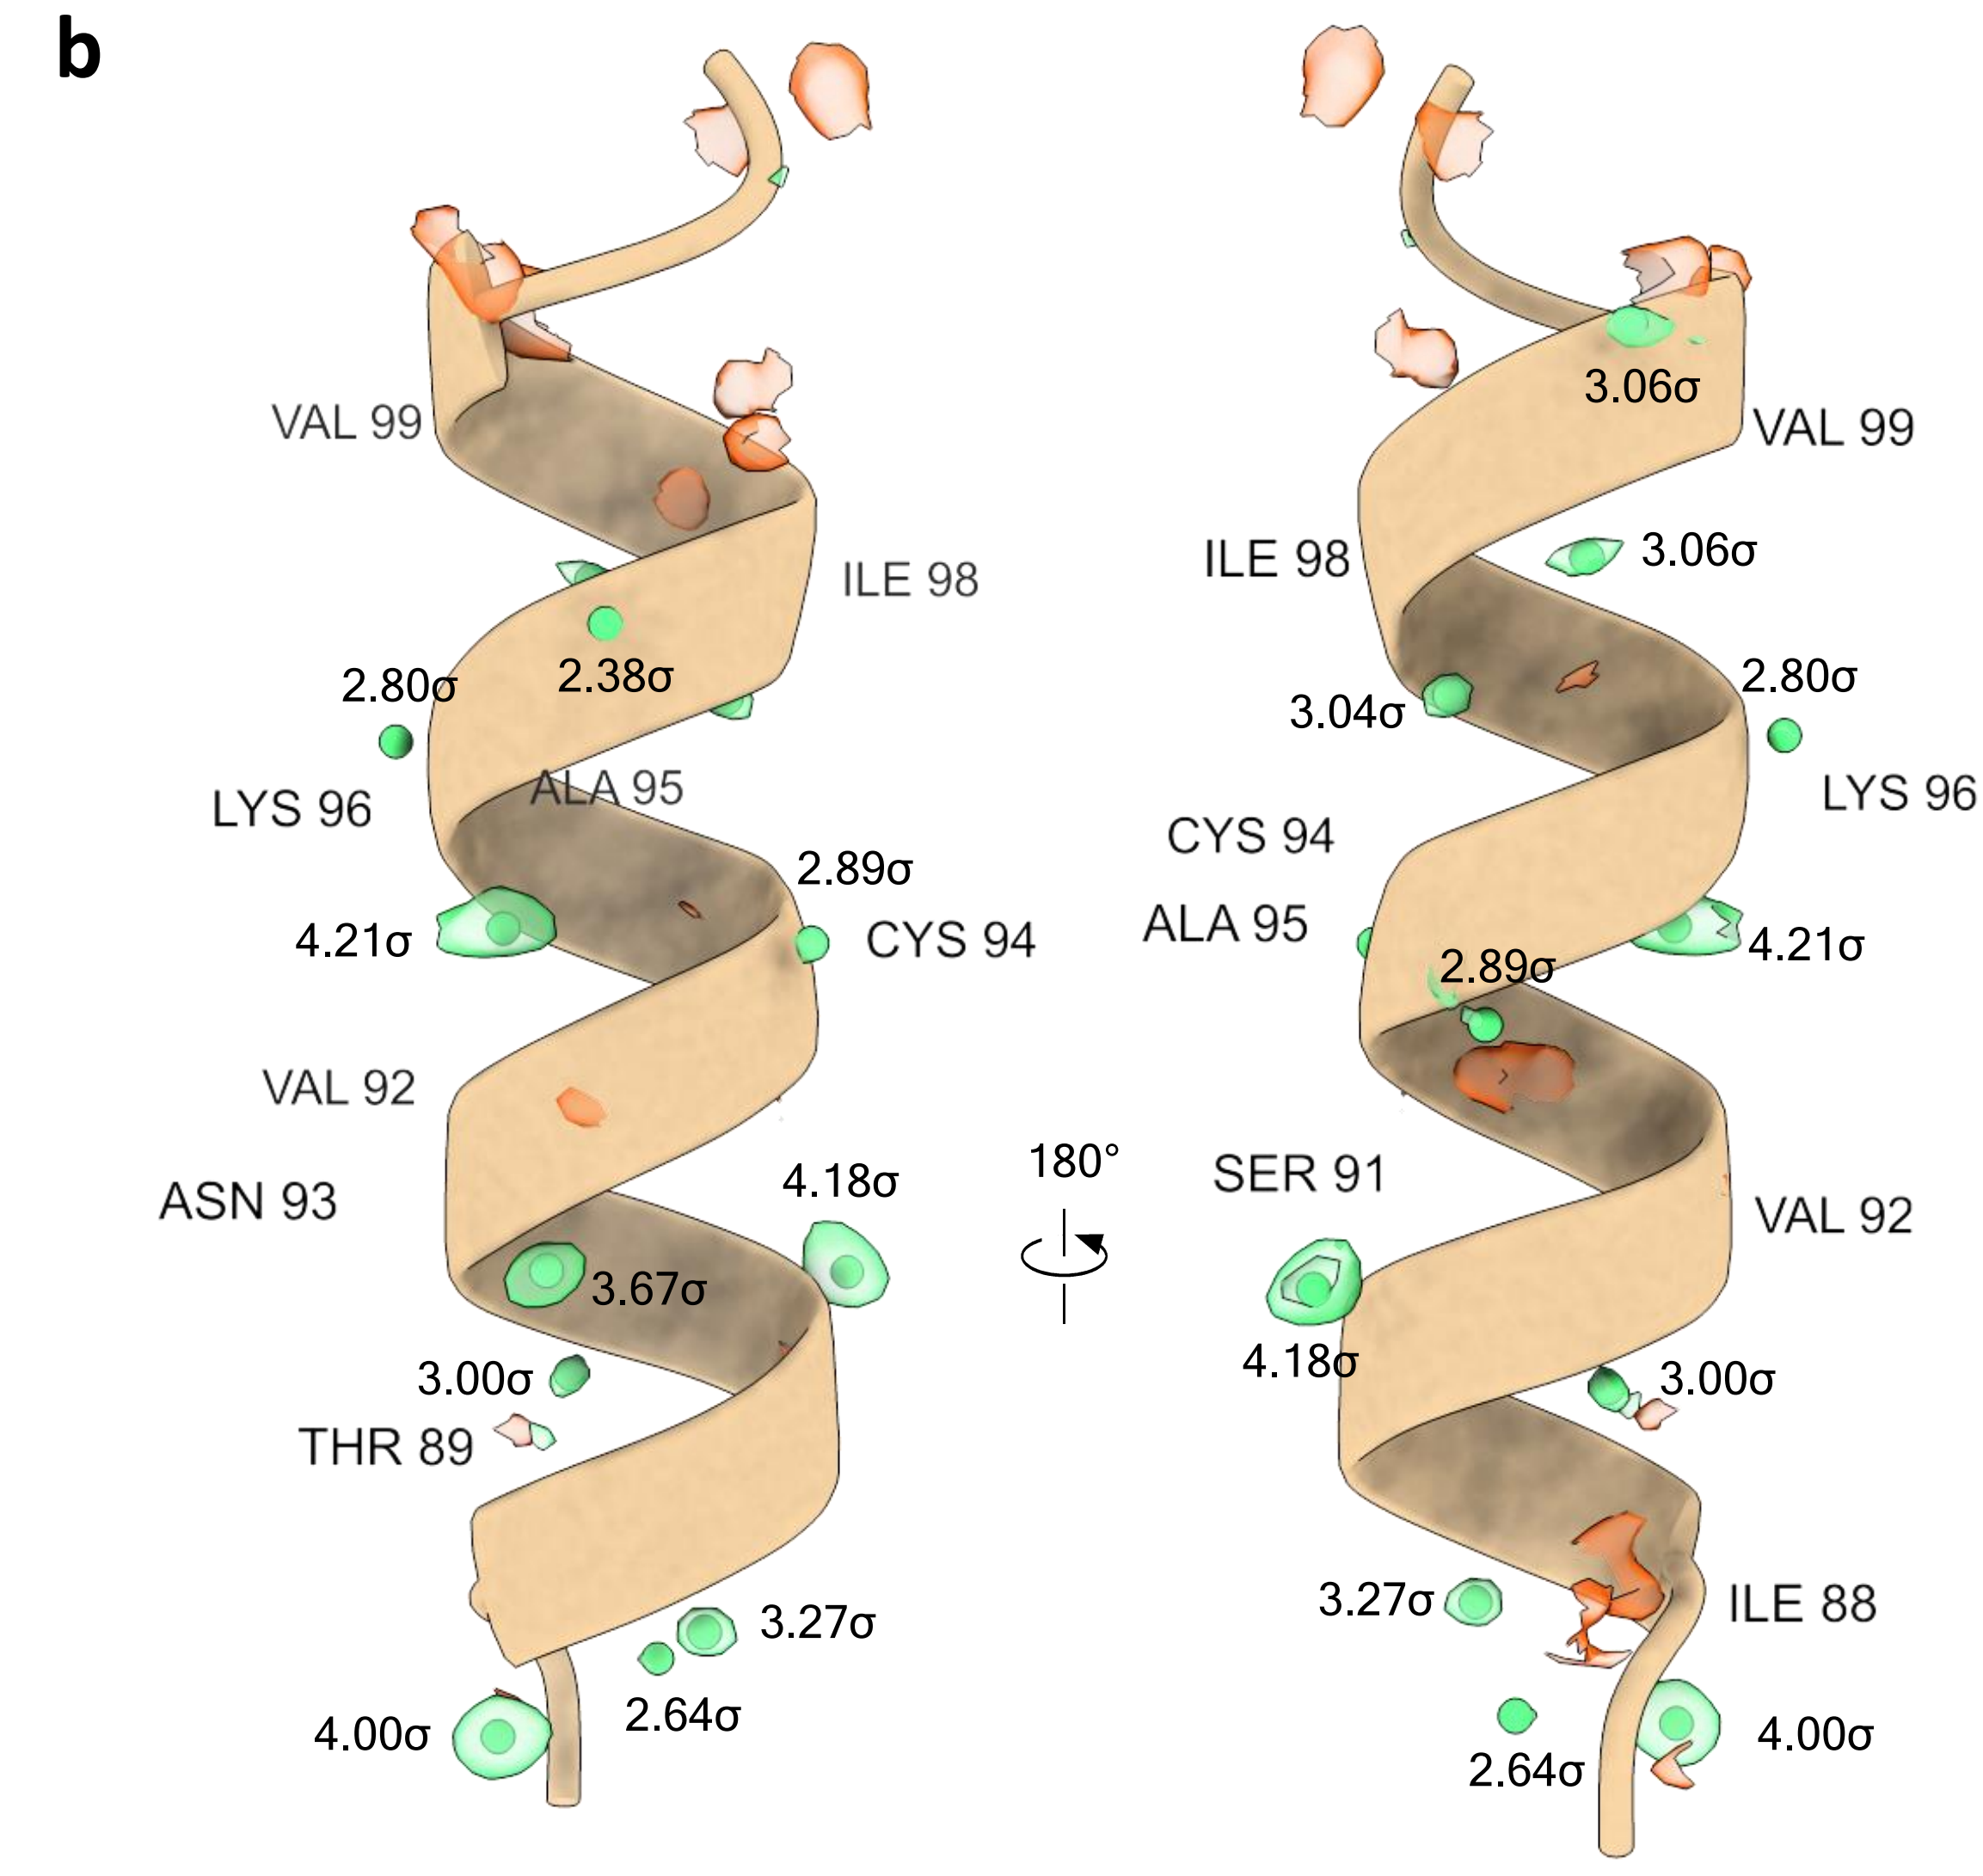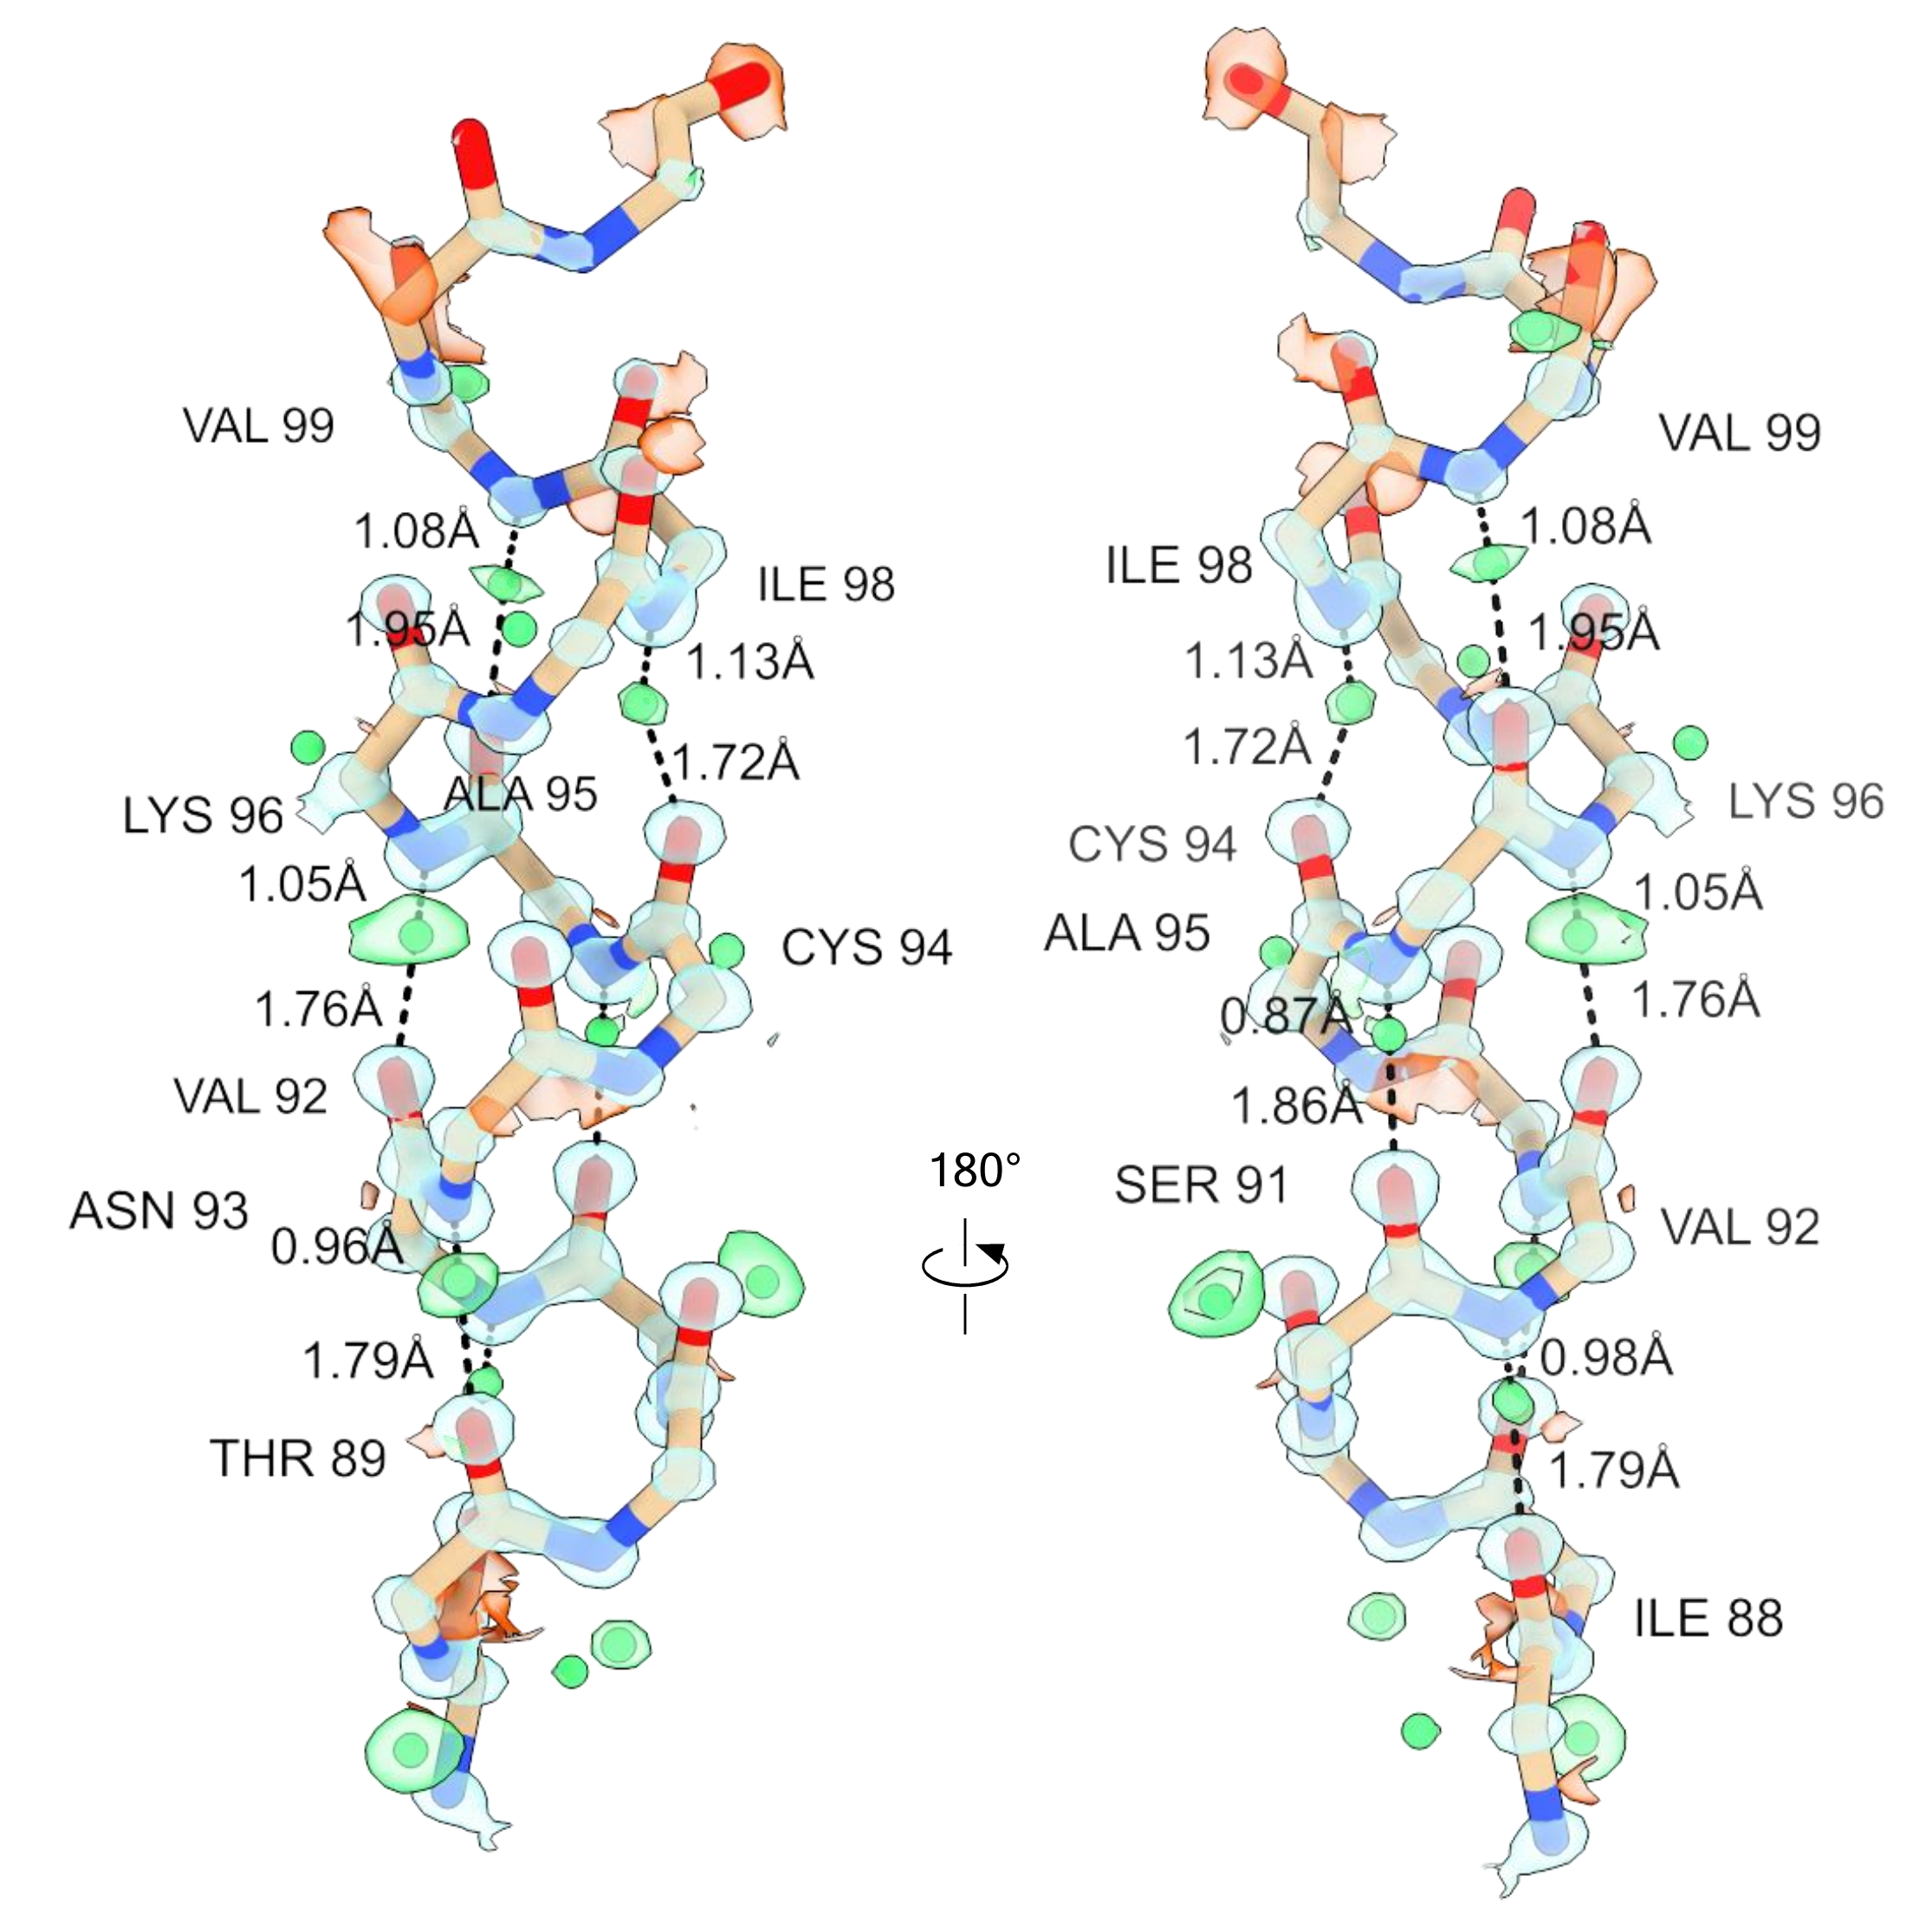

**a**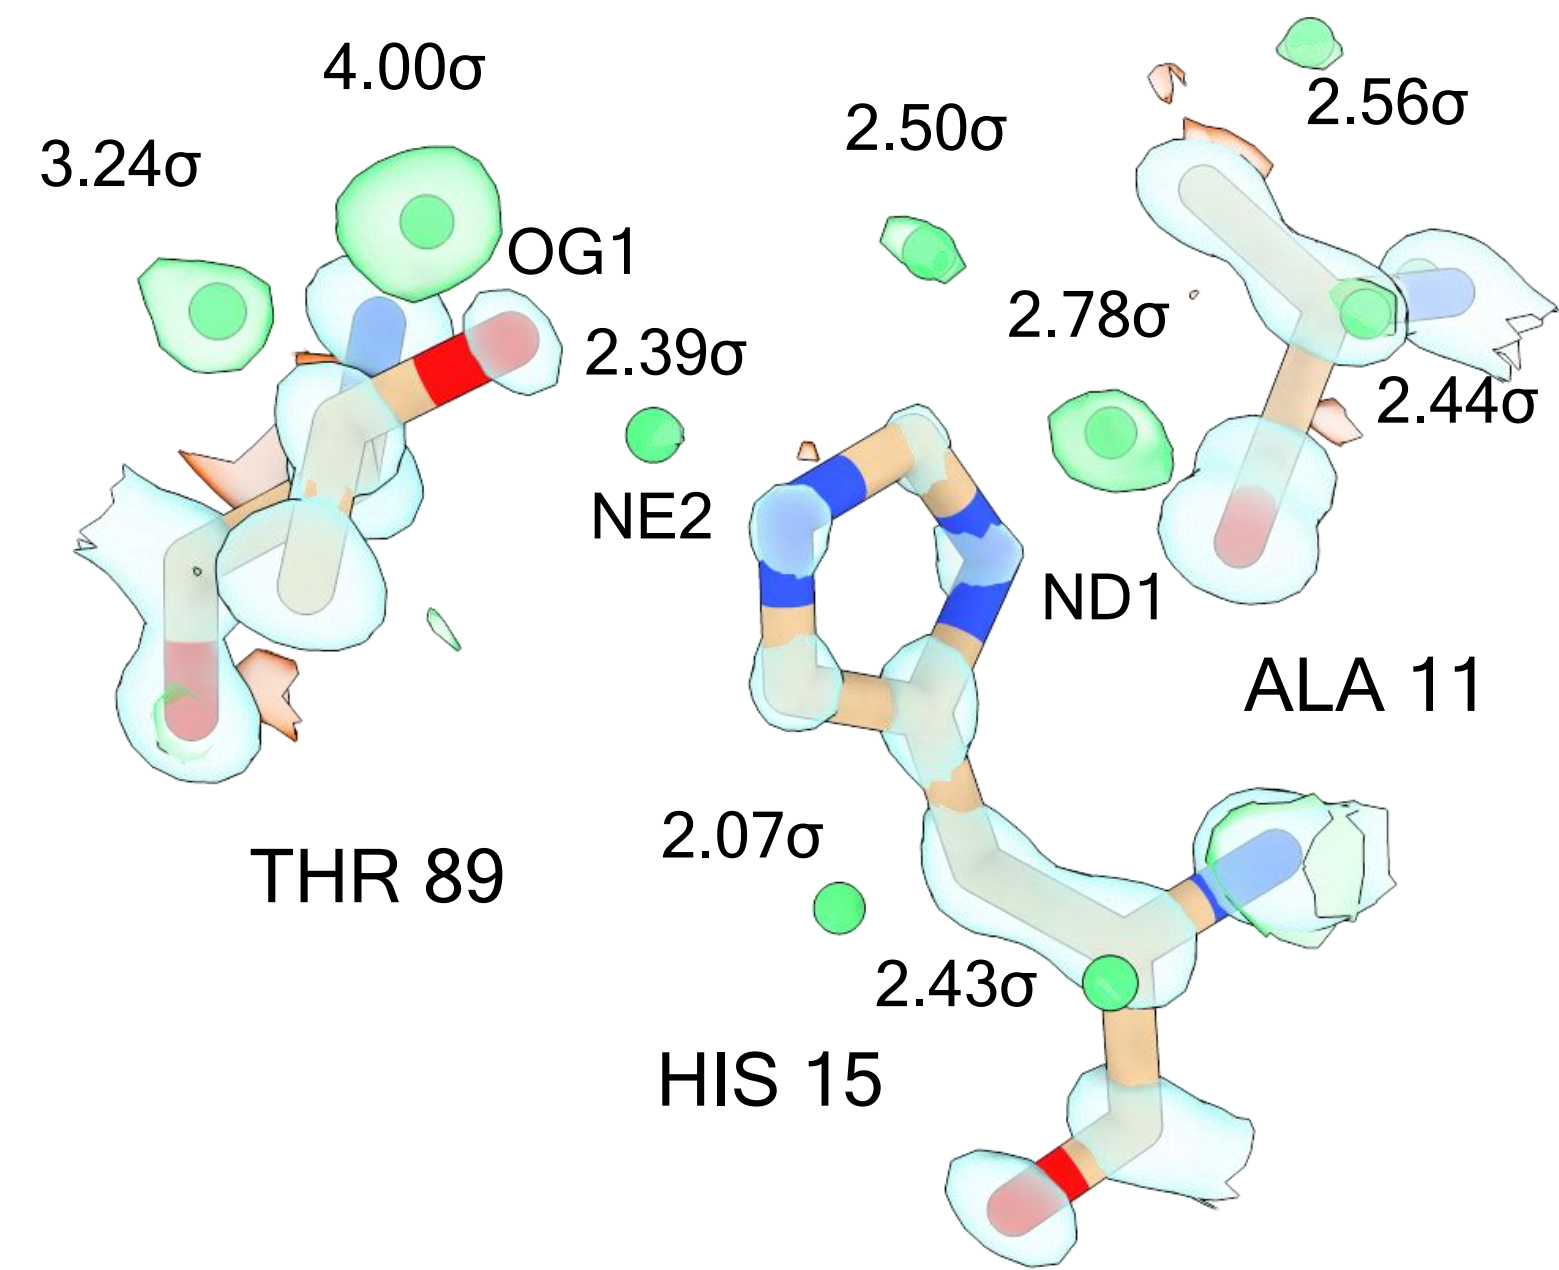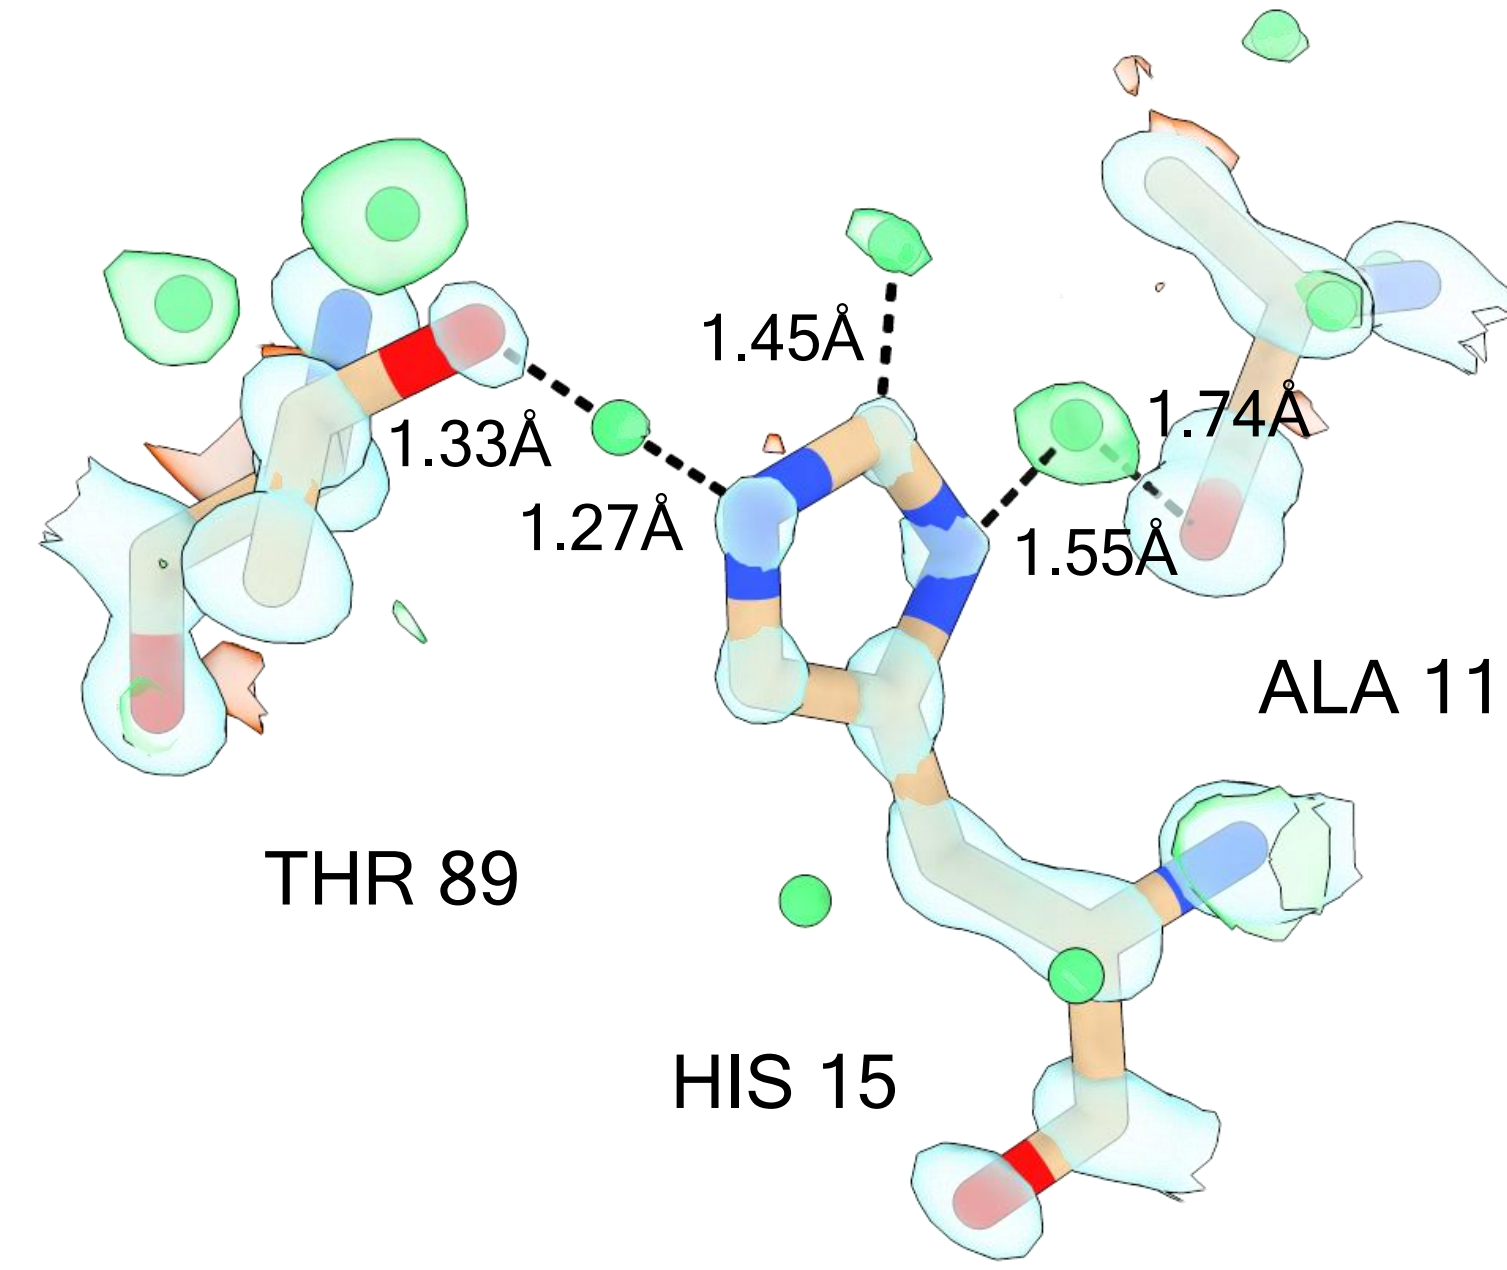**b**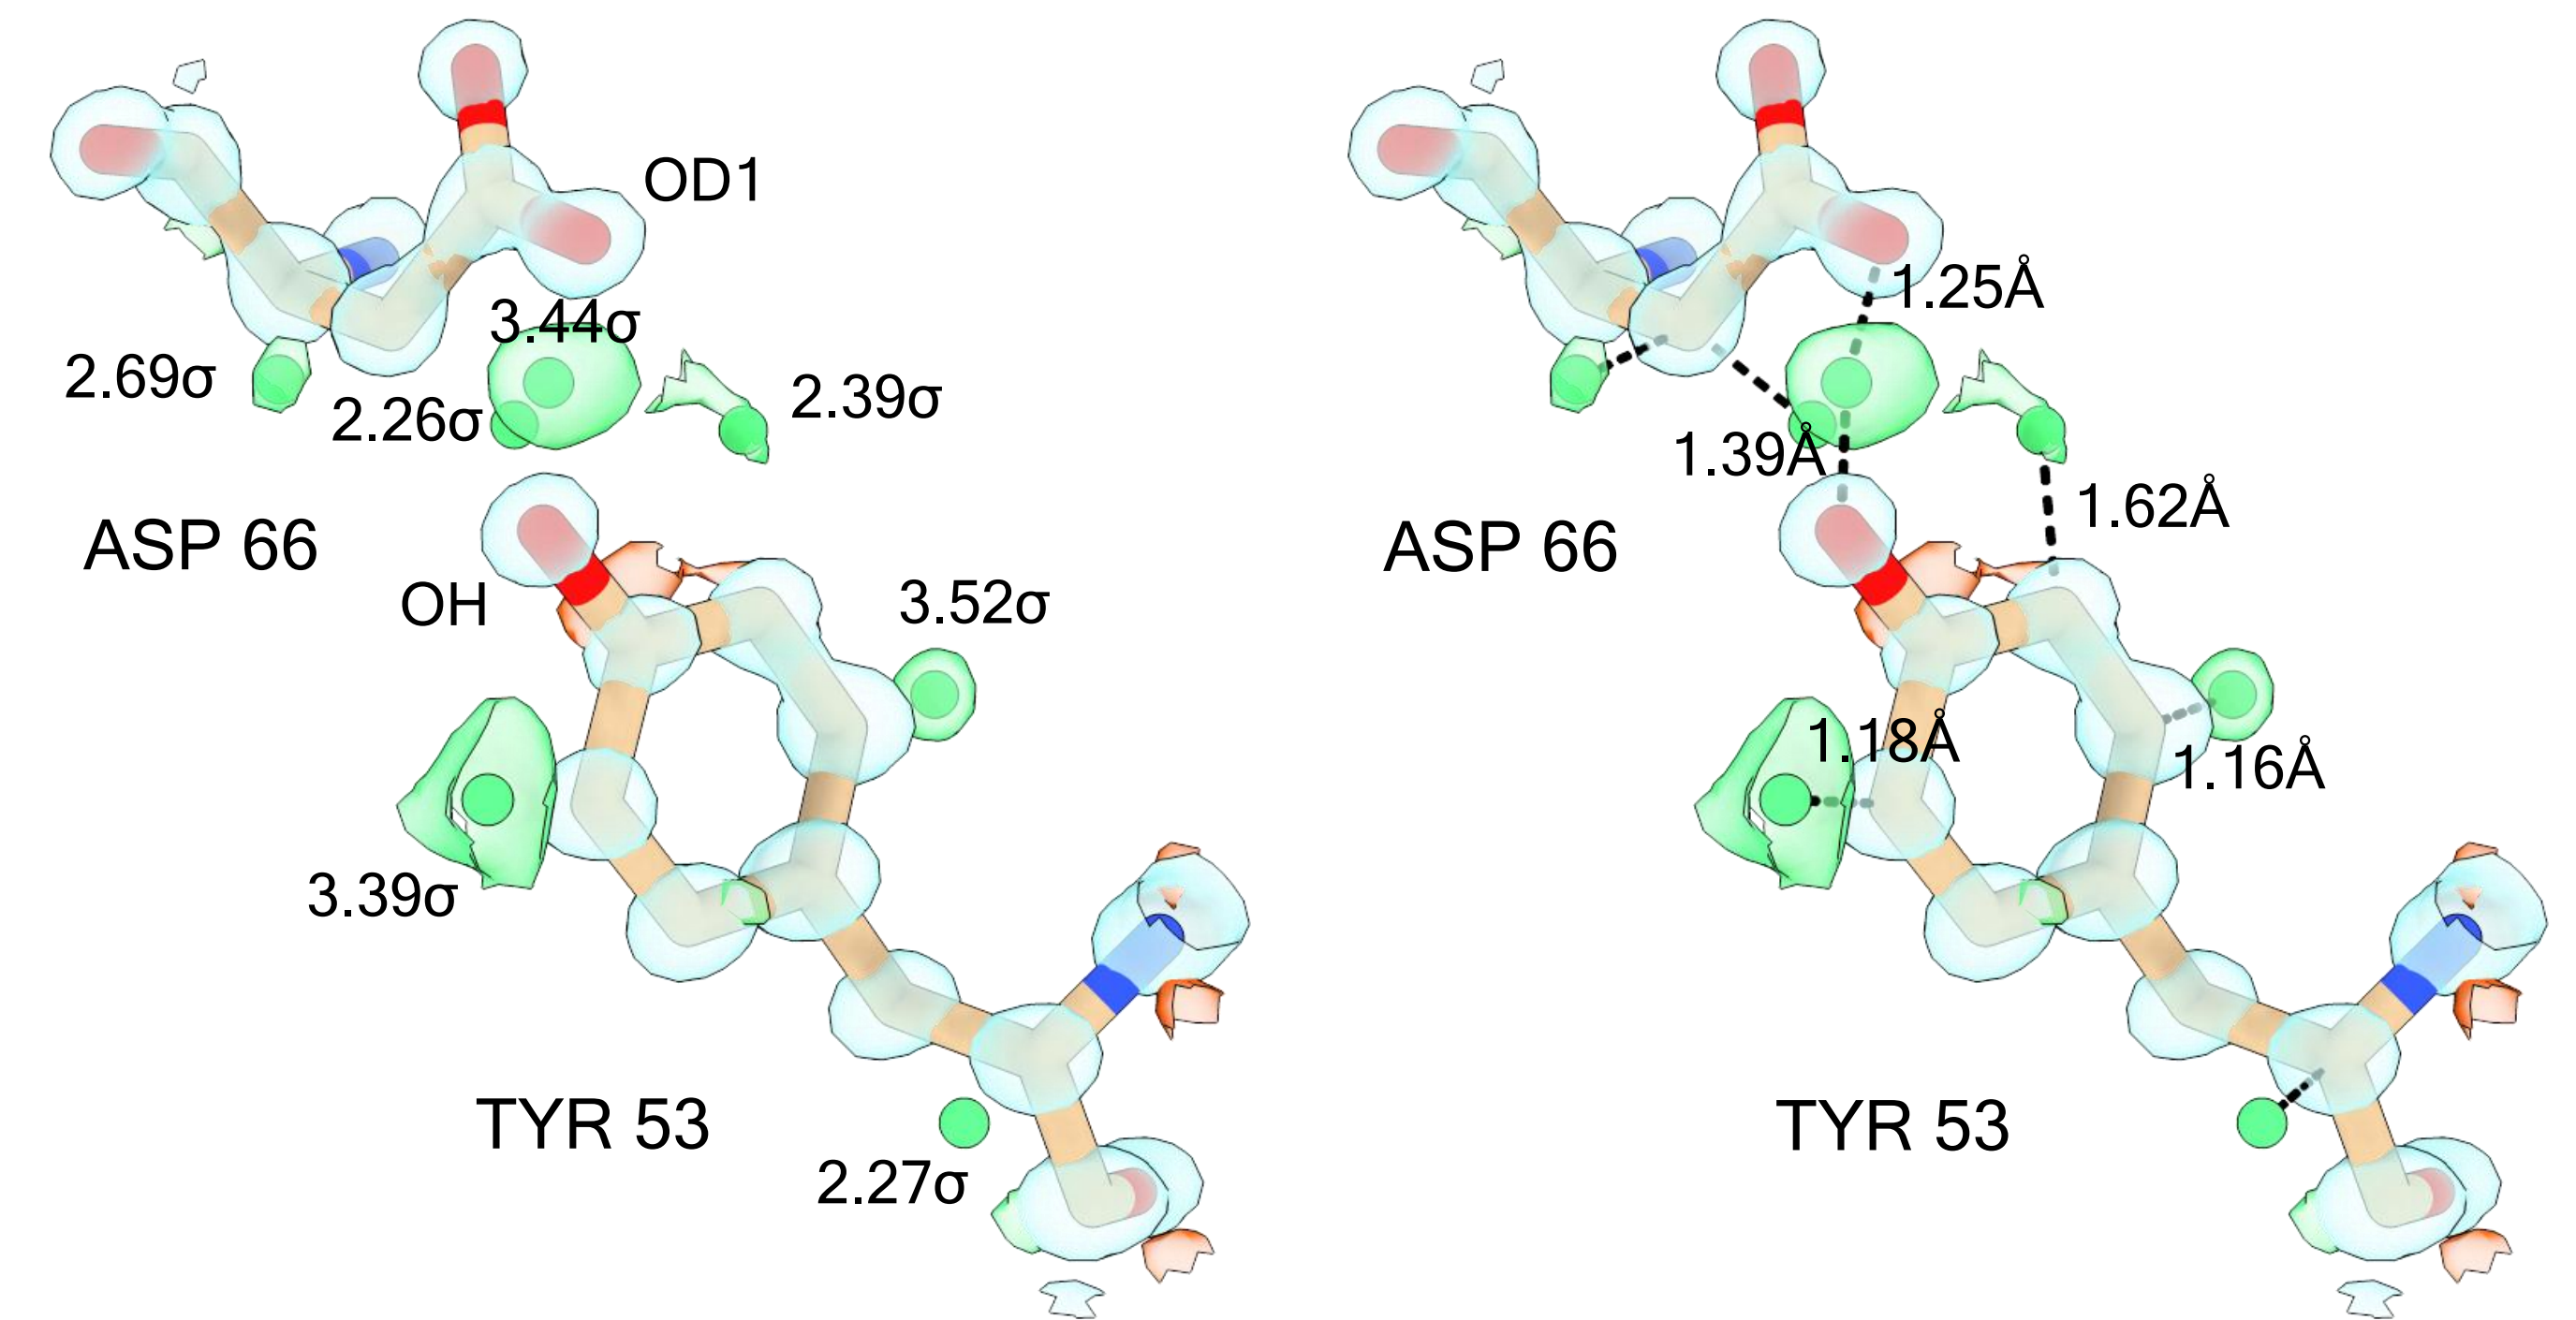**c**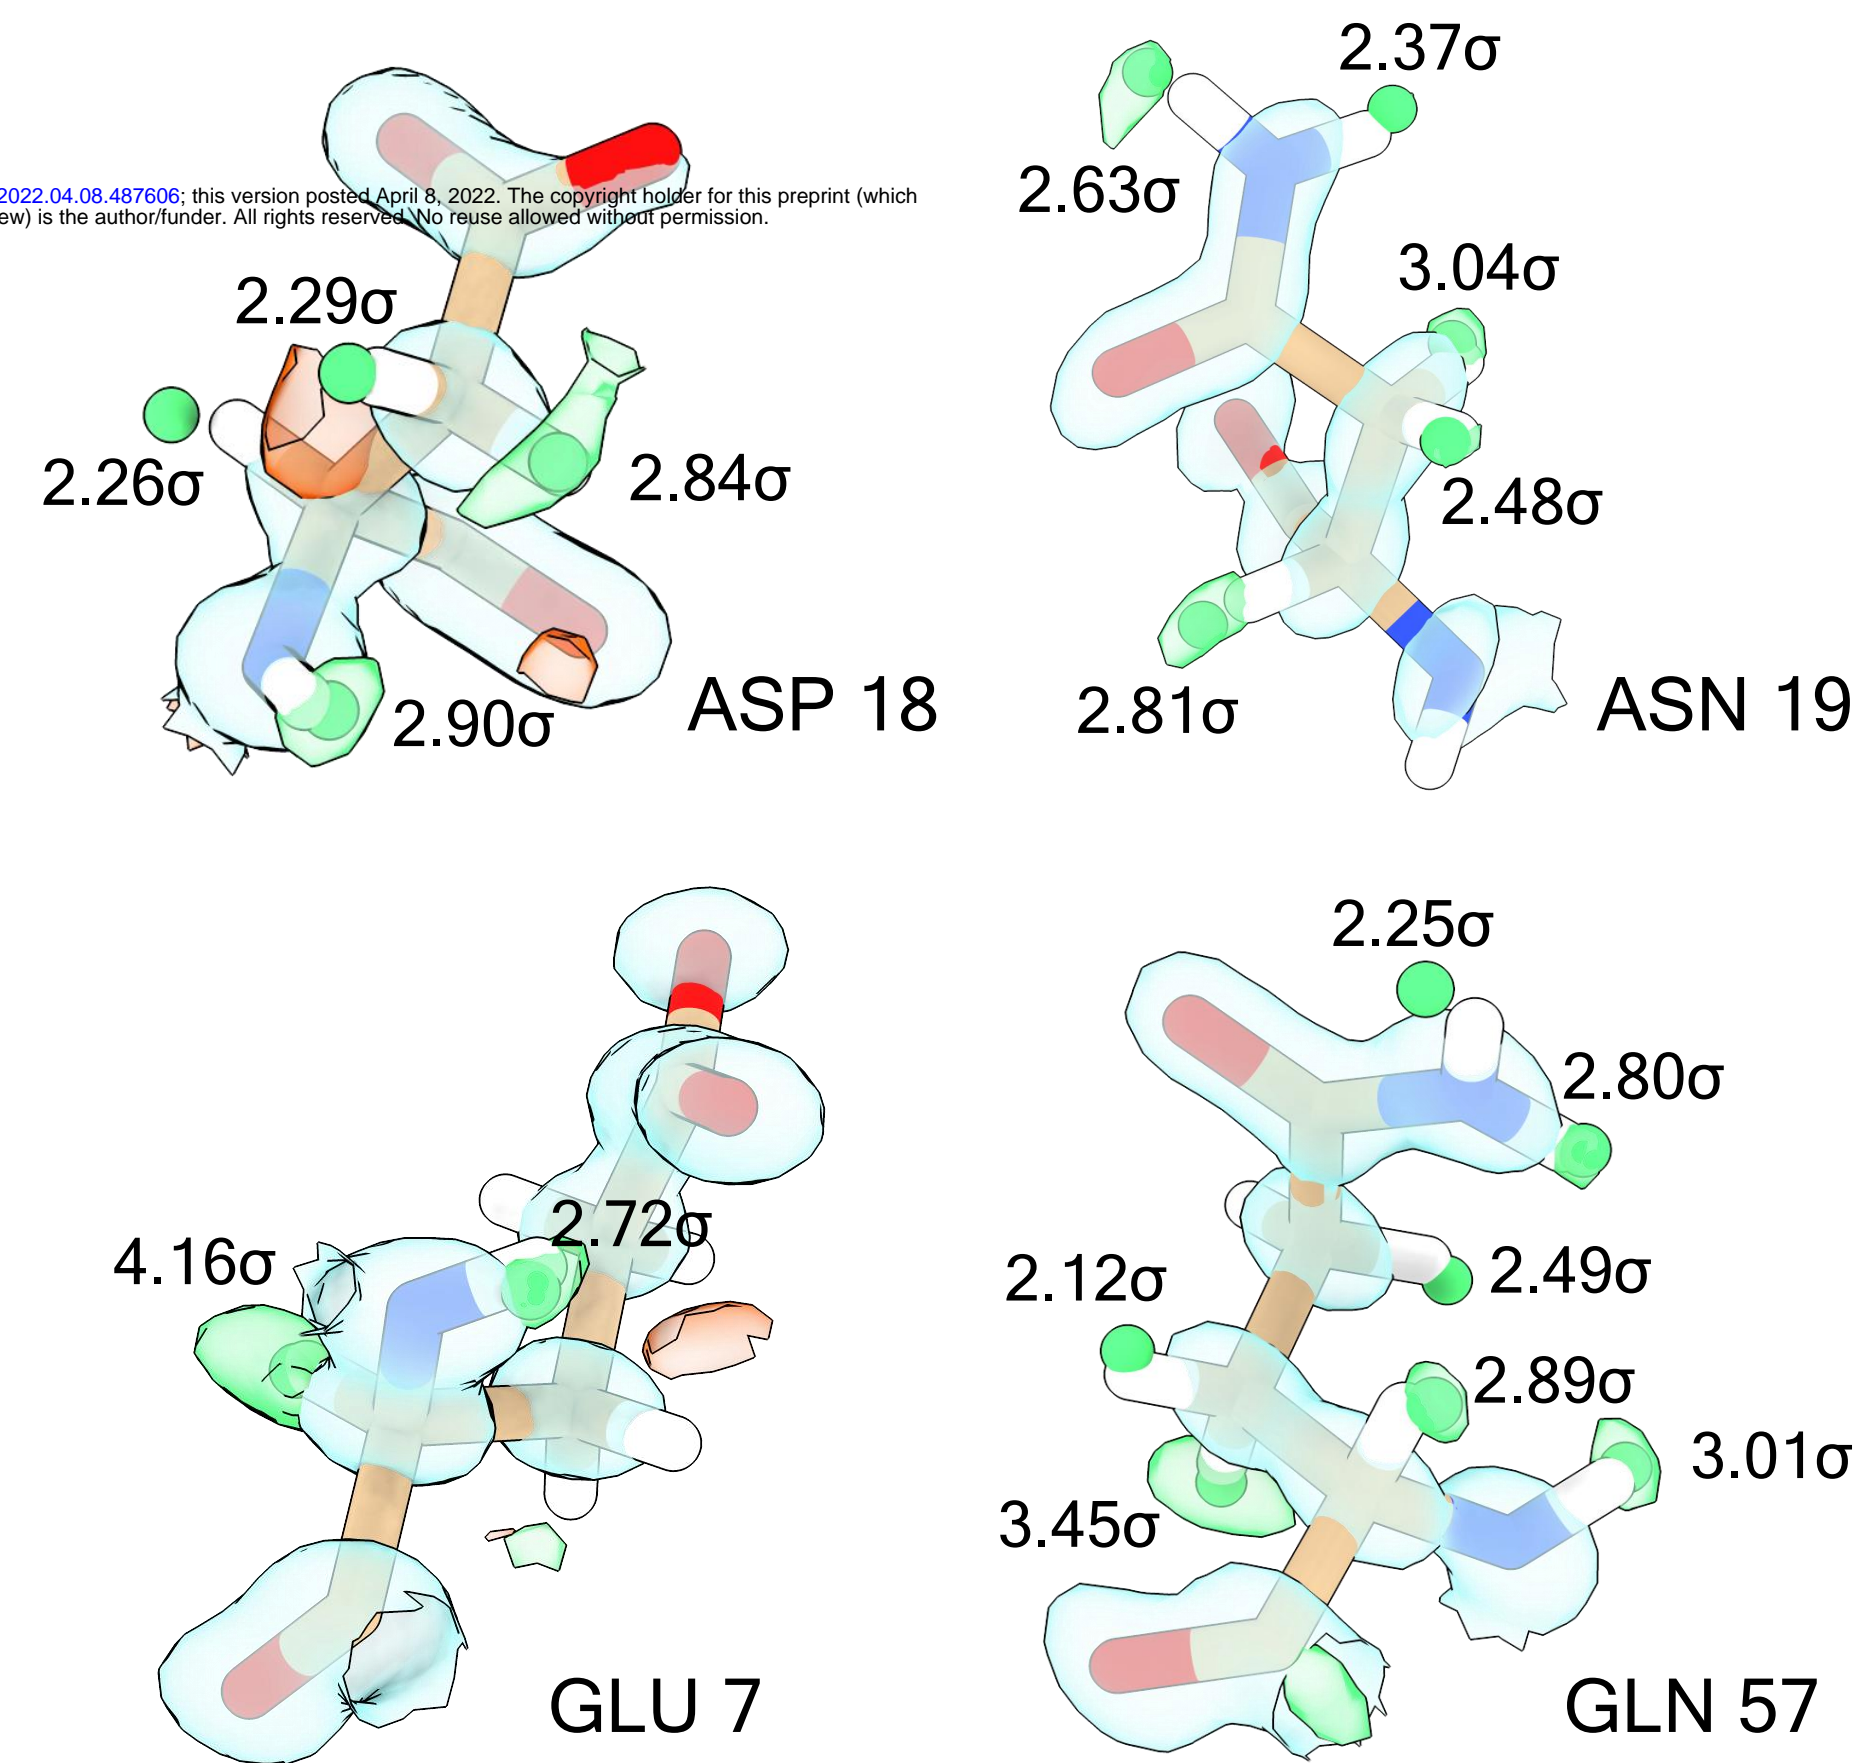**d**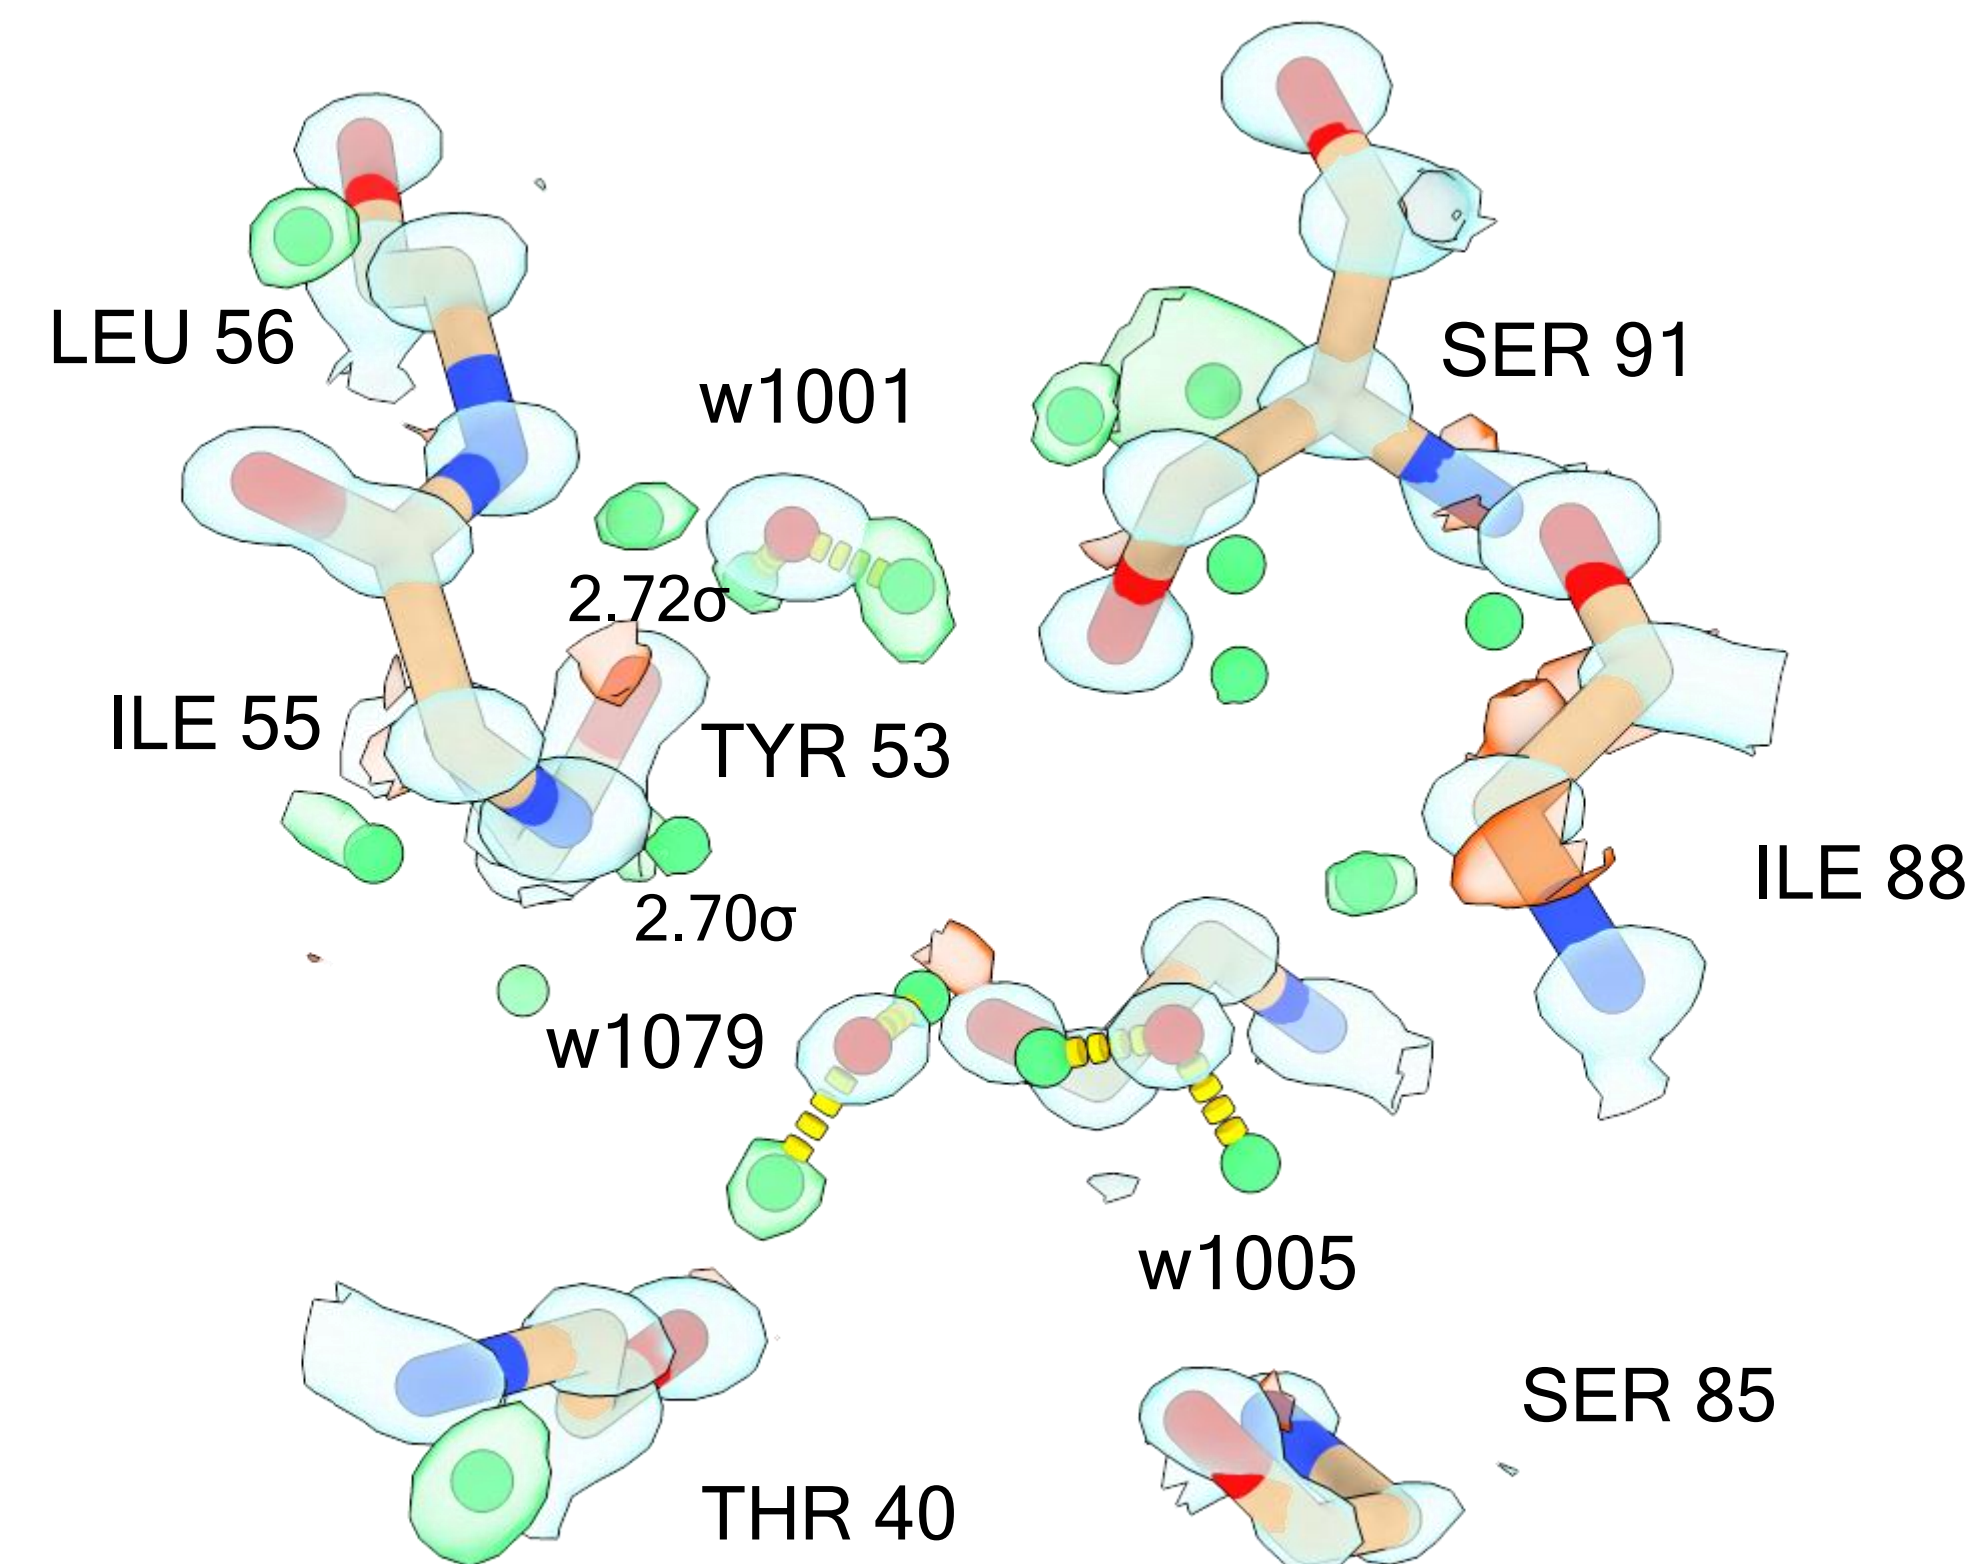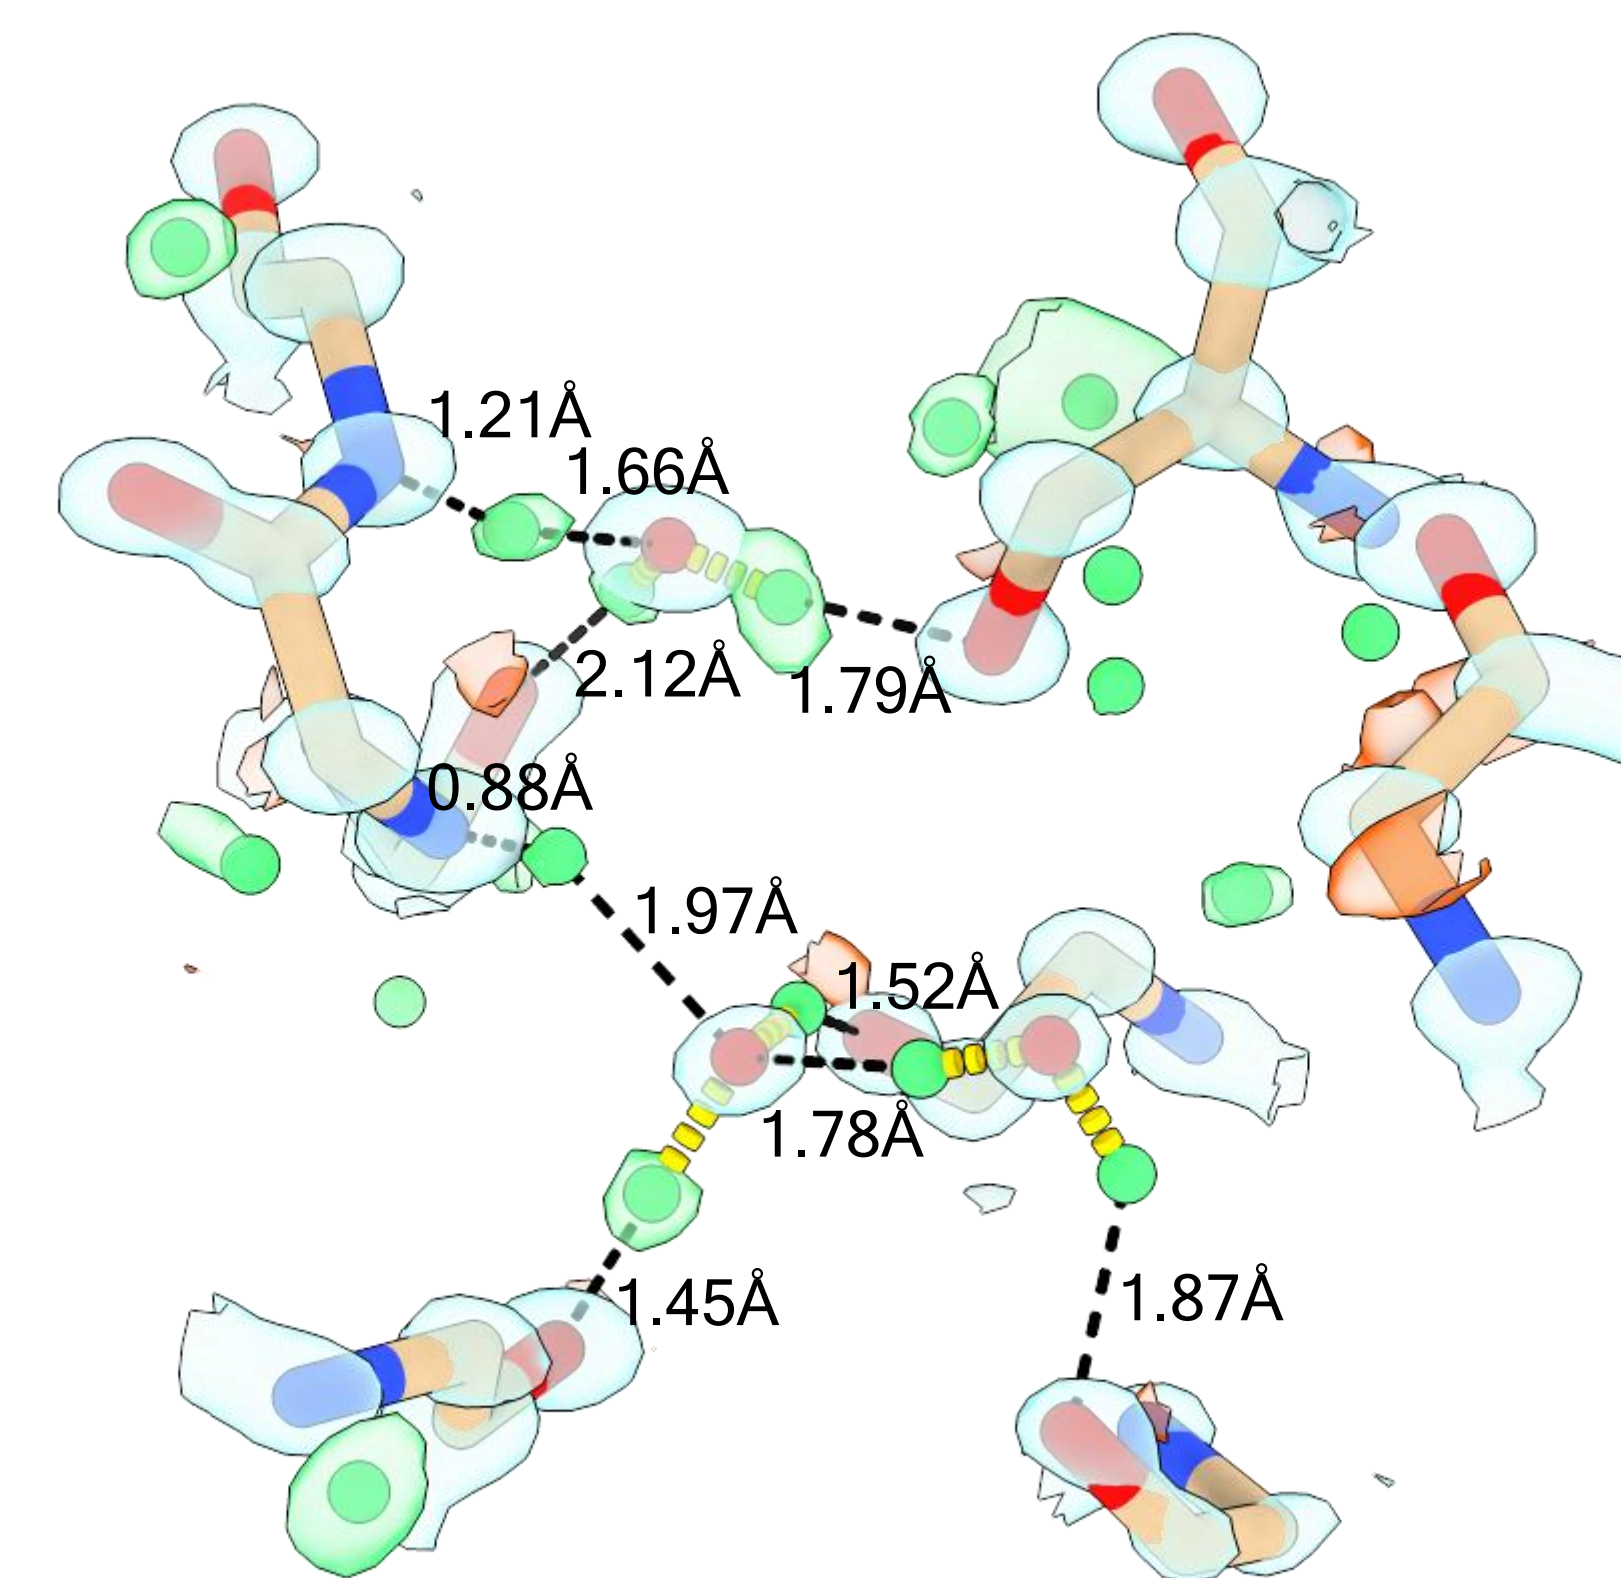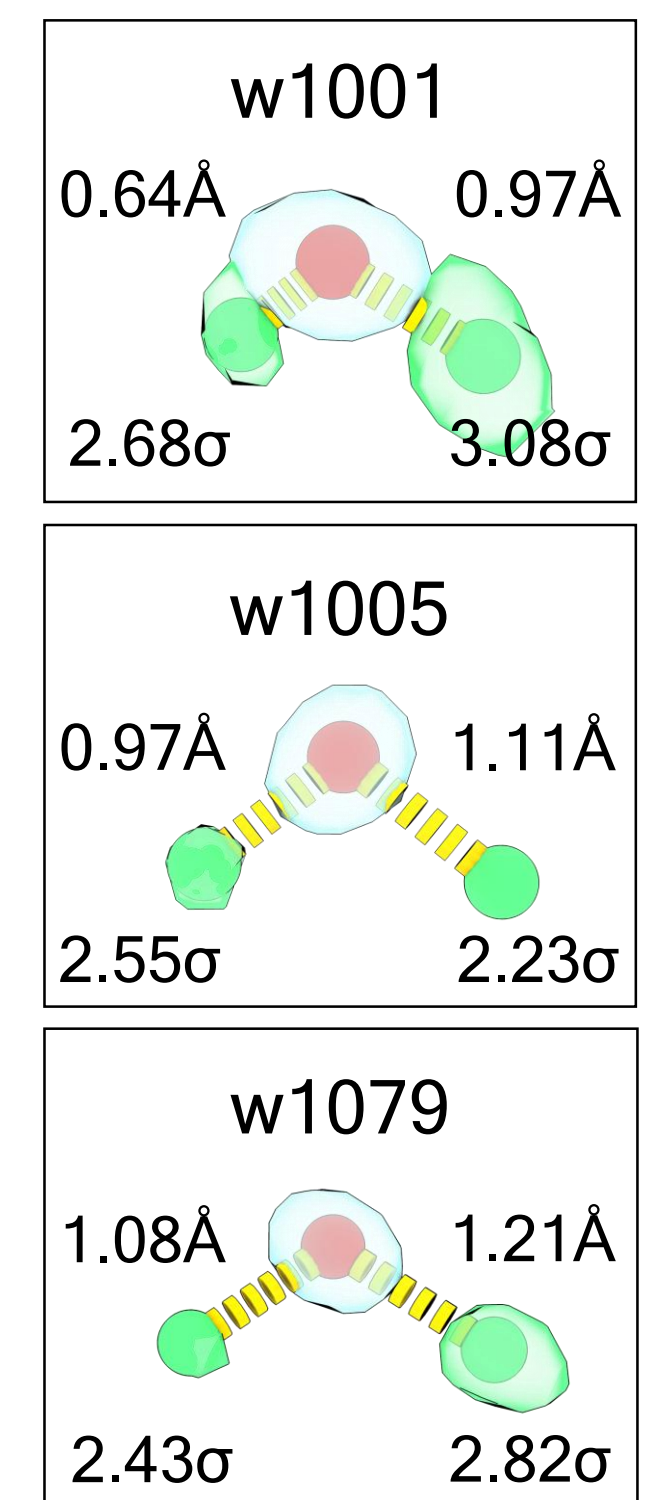

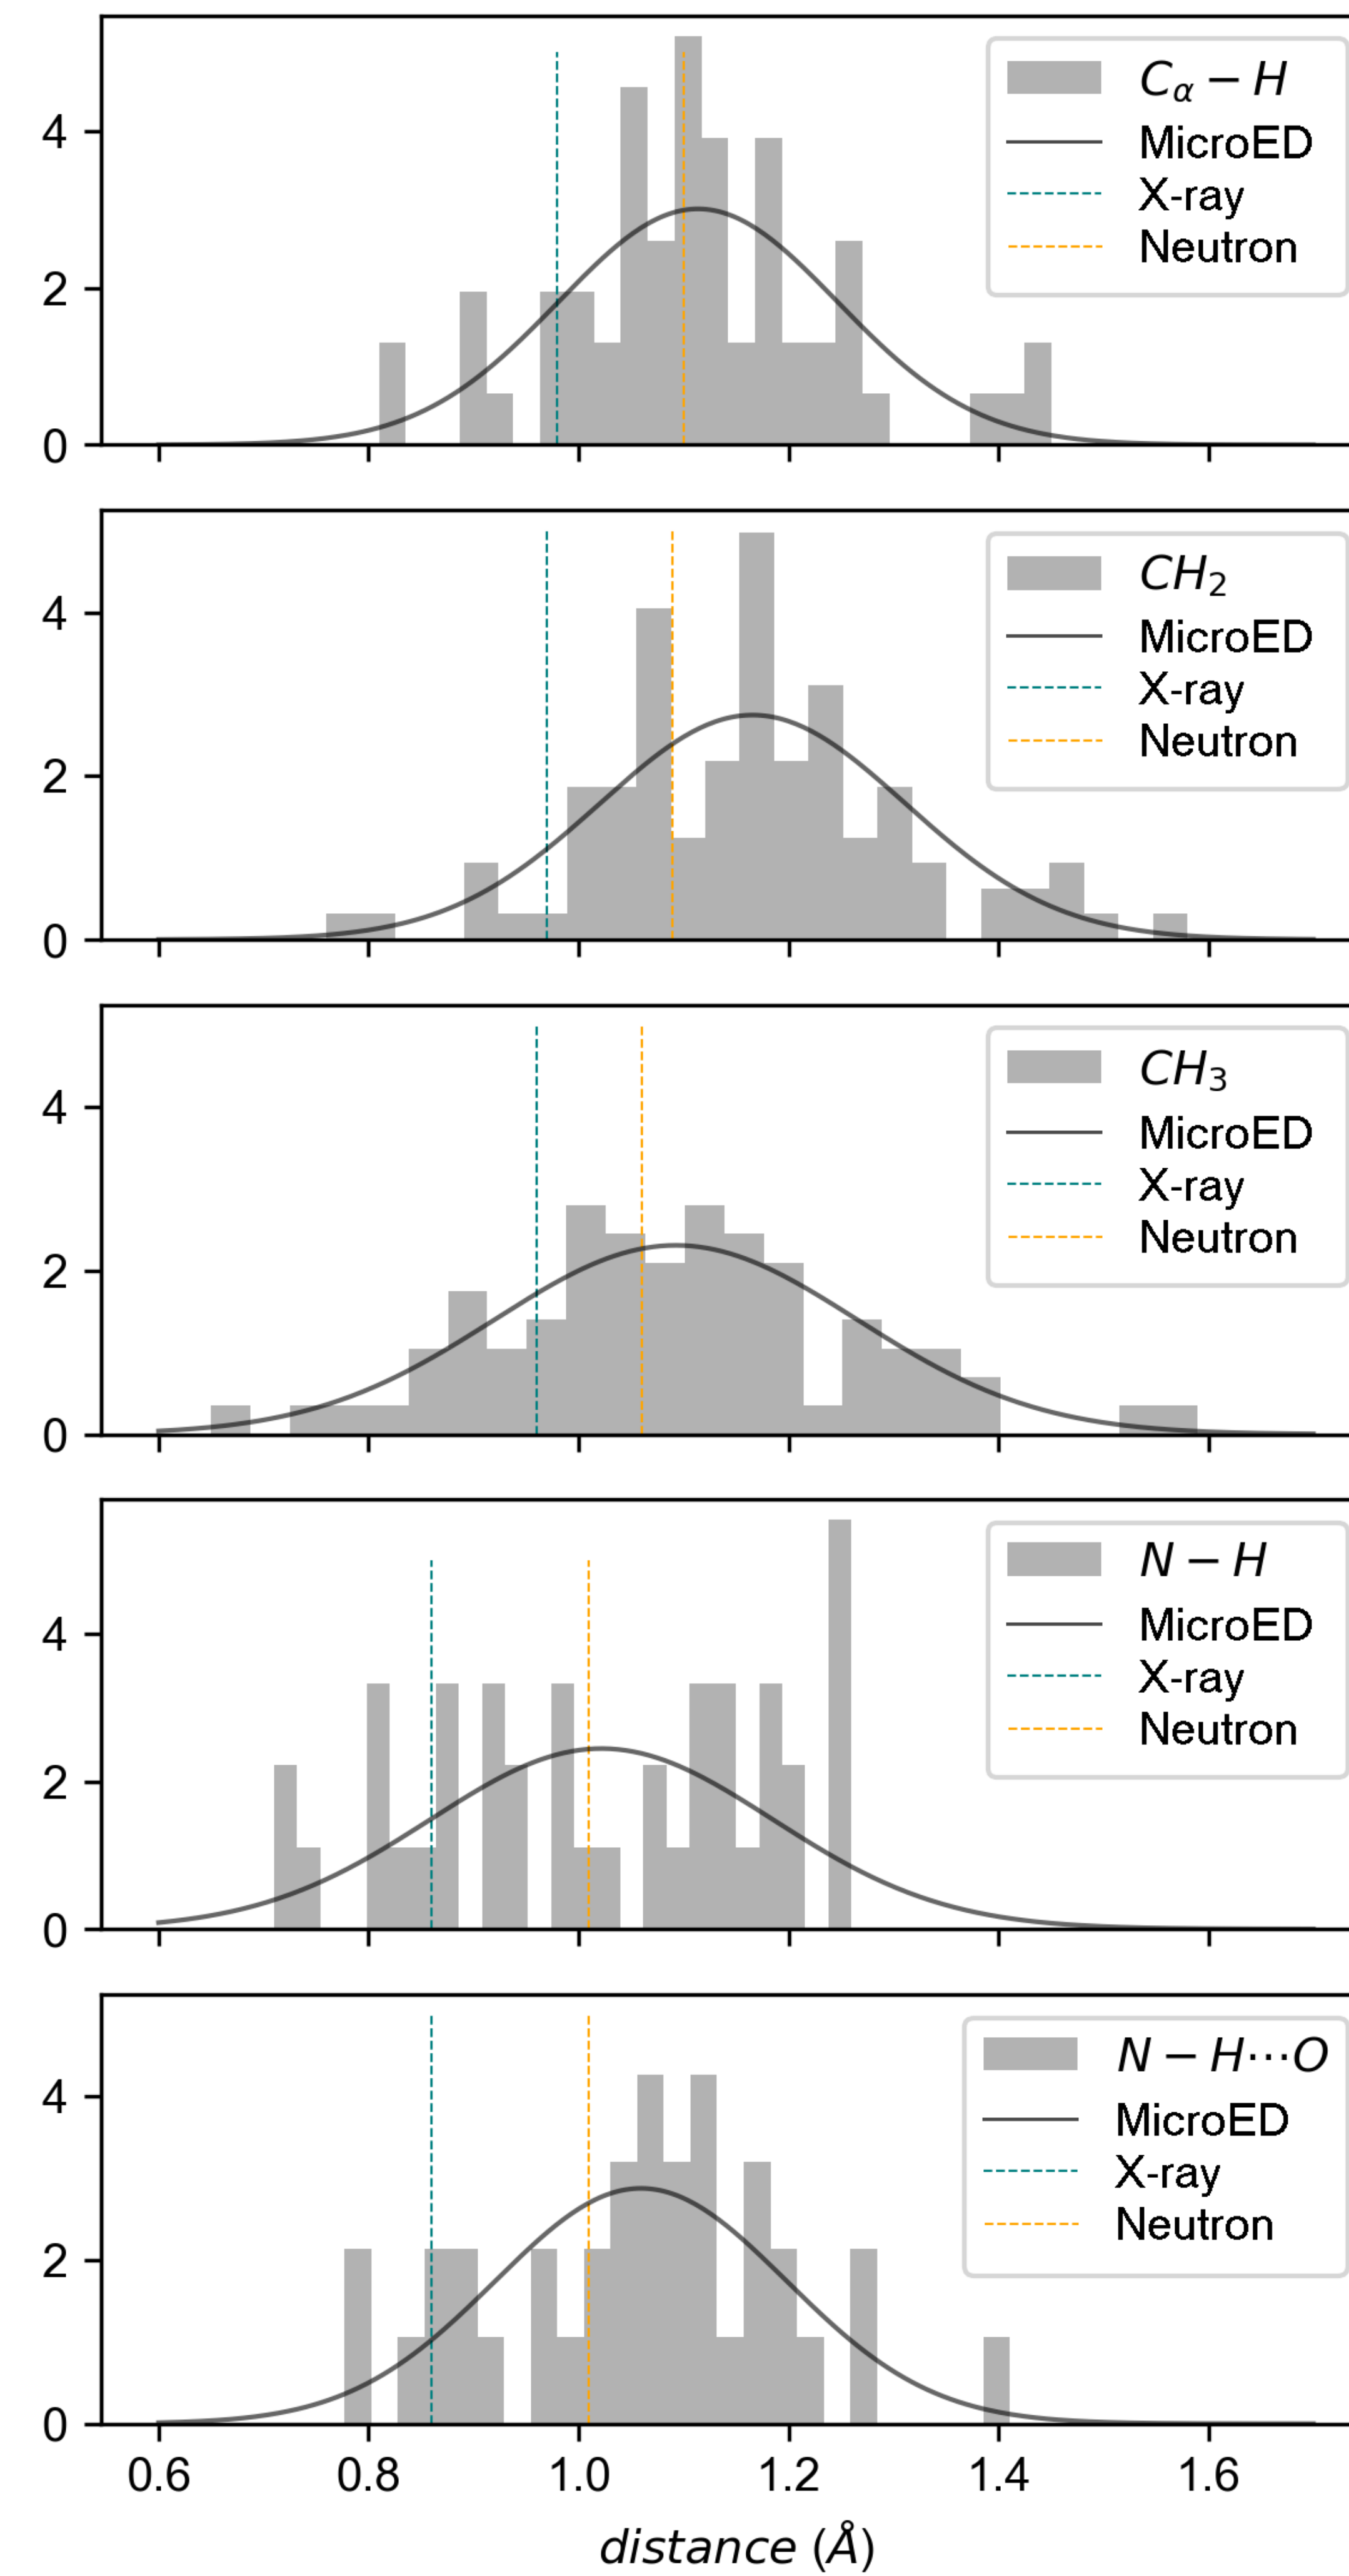

Source: https://www.biorxiv.org/content/10.1101/2022.04.08.487606v1.full.pdf
